# Supplementary material for: Bio-orthogonal triazolinedione (TAD) crosslinked protein nanocapsules affect protein adsorption and cell interaction
Source: Royal Society of Chemistry journal article supplement (doi:10.1039/d0py00087f), 2020-01-01
Supplement: d0py00087f1.xlsx [file d0py00087f1.xlsx]

## Sheet: BSA
					Amount in fmol				Amount in %						Amount in %
					BSA-TAD		BSA-TDI		BSA-TAD		BSA-TDI				BSA-TAD		BSA-TDI
Accession	Annotation	Peptide count	Unique peptides	Description	Plasma	Serum	Plasma	Serum	Plasma	Serum	Plasma	Serum			Plasma	Serum	Plasma	Serum
P02763	Acute Phase	9	7	Alpha-1-acid glycoprotein 1 OS=Homo sapiens GN=ORM1 PE=1 SV=1	0.741635	0.904724	1.87858	1.2069	0.069297	0.083951	0.158103	0.0896372		Acute Phase	1.87152	1.91694	2.71242	5.48906
P19652	Acute Phase	5	3	Alpha-1-acid glycoprotein 2 OS=Homo sapiens GN=ORM2 PE=1 SV=2	0.274219	0.63778	0.985773	1.90658	0.0256226	0.0591808	0.0829637	0.141604		Coagulation	37.5197	26.1872	7.58807	10.2112
P01011	Acute Phase	4	3	Alpha-1-antichymotrypsin OS=Homo sapiens GN=SERPINA3 PE=1 SV=2	0.323033	0.243531	0.873114	0.286103	0.0301836	0.0225977	0.0734822	0.0212491		Complement system	8.12035	10.5584	16.6055	17.3778
P01009	Acute Phase	10	9	Alpha-1-antitrypsin OS=Homo sapiens GN=SERPINA1 PE=1 SV=3	0.954396	1.47804	3.24691	1.78602	0.089177	0.13715	0.273263	0.132649		Immunoglobulins	7.01574	9.25078	22.567	24.1625
P01023	Acute Phase	31	31	Alpha-2-macroglobulin OS=Homo sapiens GN=A2M PE=1 SV=3	0.53864	0.668368	3.24592	2.58409	0.0503296	0.0620191	0.27318	0.191922		Lipoproteins	3.25412	3.91968	9.96247	7.80531
P00450	Acute Phase	11	10	Ceruloplasmin OS=Homo sapiens GN=CP PE=1 SV=1	3.608	0.664806	4.76798	2.07353	0.337125	0.0616886	0.401278	0.154003		Serum albumin	4.23527	5.85086	13.4248	4.48019
P02751	Acute Phase	32	30	Fibronectin OS=Homo sapiens GN=FN1 PE=1 SV=4	0.535927	1.00816	1.68467	1.95933	0.050076	0.0935487	0.141783	0.145521		Other proteins	21.2966	20.2473	15.6205	12.9258
P00738	Acute Phase	15	7	Haptoglobin OS=Homo sapiens GN=HP PE=1 SV=1	2.16611	3.72395	9.20823	24.6698	0.202397	0.345552	0.774974	1.83224		Tissue Leakage	16.6867	22.0687	11.5192	17.5482
P00739	Acute Phase	11	3	Haptoglobin-related protein OS=Homo sapiens GN=HPR PE=2 SV=2	0.721529	0.858936	1.50716	1.65512	0.0674183	0.0797022	0.126844	0.122927
P18428	Acute Phase	11	10	Lipopolysaccharide-binding protein OS=Homo sapiens GN=LBP PE=1 SV=3	2.50377	3.3684	1.56931	2.82078	0.233948	0.31256	0.132075	0.209502			100	100	100	100
P02775	Acute Phase	5	5	Platelet basic protein OS=Homo sapiens GN=PPBP PE=1 SV=3	6.78799	6.06275	1.80319	2.12655	0.634257	0.562573	0.151758	0.157941
P0DJI8	Acute Phase	3	2	Serum amyloid A-1 protein OS=Homo sapiens GN=SAA1 PE=1 SV=1	0.342766	0.261165	0.00455347	0.0377322	0.0320274	0.024234	0.000383225	0.0028024
P02743	Acute Phase	8	8	Serum amyloid P-component OS=Homo sapiens GN=APCS PE=1 SV=2	0.531507	0.777884	1.45357	30.7935	0.049663	0.0721813	0.122334	2.28706
P08697	Coagulation	4	4	Alpha-2-antiplasmin OS=Homo sapiens GN=SERPINF2 PE=1 SV=3	0.202814	0.533701	0.189767	0.263508	0.0189506	0.0495231	0.015971	0.019571
P01008	Coagulation	31	30	Antithrombin-III OS=Homo sapiens GN=SERPINC1 PE=1 SV=1	0.814902	31.9755	1.39291	12.4251	0.076143	2.96707	0.117229	0.922824
Q96IY4	Coagulation	8	7	Carboxypeptidase B2 OS=Homo sapiens GN=CPB2 PE=1 SV=2	0.328236	1.99822	1.07077	1.77529	0.0306698	0.185419	0.0901167	0.131852
P12259	Coagulation	50	44	Coagulation factor V OS=Homo sapiens GN=F5 PE=1 SV=4	2.12049	11.9117	3.76163	21.9512	0.198135	1.10531	0.316582	1.63033
P03951	Coagulation	40	36	Coagulation factor XI OS=Homo sapiens GN=F11 PE=1 SV=1	47.7221	36.5223	1.82503	1.64052	4.45906	3.38897	0.153596	0.121843
P00748	Coagulation	3	3	Coagulation factor XII OS=Homo sapiens GN=F12 PE=1 SV=3	0.559486	0.356479	0.963991	0.81754	0.0522774	0.0330784	0.0811305	0.0607194
P00488	Coagulation	11	10	Coagulation factor XIII A chain OS=Homo sapiens GN=F13A1 PE=1 SV=4	0.267589	1.48297	1.01094	5.91803	0.0250031	0.137608	0.0850819	0.439537
P02671	Coagulation	35	33	Fibrinogen alpha chain OS=Homo sapiens GN=FGA PE=1 SV=2	81.6324	2.20375	5.14689	1.14378	7.62758	0.20449	0.433168	0.0849497
P02675	Coagulation	32	29	Fibrinogen beta chain OS=Homo sapiens GN=FGB PE=1 SV=2	12.3914	1.34396	6.07	4.45123	1.15783	0.124708	0.510857	0.330597
P02679	Coagulation	25	23	Fibrinogen gamma chain OS=Homo sapiens GN=FGG PE=1 SV=3	20.9547	1.43256	8.17975	1.26653	1.95797	0.132929	0.688416	0.0940662
P23142	Coagulation	8	7	Fibulin-1 OS=Homo sapiens GN=FBLN1 PE=1 SV=4	0.0361083	0.113349	3.22635	1.03011	0.00337389	0.0105179	0.271533	0.076507
P04196	Coagulation	23	21	Histidine-rich glycoprotein OS=Homo sapiens GN=HRG PE=1 SV=1	60.7581	12.4801	2.95837	1.8783	5.67713	1.15805	0.24898	0.139503
P08514	Coagulation	31	30	Integrin alpha-IIb OS=Homo sapiens GN=ITGA2B PE=1 SV=3	21.364	26.8845	34.7398	23.3233	1.99621	2.49466	2.92374	1.73224
P05106	Coagulation	19	16	Integrin beta-3 OS=Homo sapiens GN=ITGB3 PE=1 SV=2	0.943975	0.805383	0.722433	1.24477	0.0882033	0.0747329	0.0608007	0.0924503
P01042	Coagulation	29	28	Kininogen-1 OS=Homo sapiens GN=KNG1 PE=1 SV=2	98.2759	28.3764	3.95252	2.98944	9.18272	2.6331	0.332648	0.222028
Q13201	Coagulation	18	16	Multimerin-1 OS=Homo sapiens GN=MMRN1 PE=1 SV=3	5.80339	5.15424	7.81385	6.0212	0.542258	0.478271	0.657622	0.447199
P05154	Coagulation	19	19	Plasma serine protease inhibitor OS=Homo sapiens GN=SERPINA5 PE=1 SV=3	12.1612	5.34593	1.23729	2.9598	1.13632	0.496058	0.104131	0.219827
P02776	Coagulation	5	3	Platelet factor 4 OS=Homo sapiens GN=PF4 PE=1 SV=2	32.525	44.8286	2.13991	4.86523	3.03908	4.15972	0.180097	0.361345
P00734	Coagulation	27	24	Prothrombin OS=Homo sapiens GN=F2 PE=1 SV=2	2.21782	67.4339	3.19259	39.0418	0.207229	6.25732	0.268692	2.89967
P07996	Coagulation	10	8	Thrombospondin-1 OS=Homo sapiens GN=THBS1 PE=1 SV=2	0.465407	1.03146	0.566524	2.47907	0.0434868	0.0957109	0.0476793	0.184122
P02730	Complement system	24	23	Band 3 anion transport protein OS=Homo sapiens GN=SLC4A1 PE=1 SV=3	6.89066	2.40991	11.4571	5.57903	0.64385	0.223619	0.964245	0.414359
P04003	Complement system	13	11	C4b-binding protein alpha chain OS=Homo sapiens GN=C4BPA PE=1 SV=2	7.69108	5.85988	8.80928	3.51749	0.71864	0.543749	0.741398	0.261247
P02745	Complement system	7	7	Complement C1q subcomponent subunit A OS=Homo sapiens GN=C1QA PE=1 SV=2	1.04457	0.72541	37.9438	17.8998	0.0976028	0.0673121	3.19339	1.32943
P02746	Complement system	9	9	Complement C1q subcomponent subunit B OS=Homo sapiens GN=C1QB PE=1 SV=3	0.517666	0.540765	39.7633	21.6579	0.0483698	0.0501785	3.34652	1.60855
P02747	Complement system	6	5	Complement C1q subcomponent subunit C OS=Homo sapiens GN=C1QC PE=1 SV=3	1.00236	0.687012	33.5989	20.1612	0.0936583	0.063749	2.82772	1.49739
P06681	Complement system	4	2	Complement C2 OS=Homo sapiens GN=C2 PE=1 SV=2	0.586313	0.312418	0.126467	0.226847	0.054784	0.0289898	0.0106436	0.0168481
P01024	Complement system	110	103	Complement C3 OS=Homo sapiens GN=C3 PE=1 SV=2	3.35858	18.3613	10.5257	49.4311	0.31382	1.70378	0.885856	3.67129
P0C0L4	Complement system	51	2	Complement C4-A OS=Homo sapiens GN=C4A PE=1 SV=2	5.06895	6.21068	1.68126	4.41726	0.473634	0.576301	0.141497	0.328074
P0C0L5	Complement system	52	3	Complement C4-B OS=Homo sapiens GN=C4B PE=1 SV=2	6.16733	7.55646	2.04557	5.37443	0.576264	0.701178	0.172157	0.399163
P01031	Complement system	36	34	Complement C5 OS=Homo sapiens GN=C5 PE=1 SV=4	0.350886	1.07119	0.901071	3.73816	0.0327862	0.0993978	0.075835	0.277636
P13671	Complement system	18	16	Complement component C6 OS=Homo sapiens GN=C6 PE=1 SV=3	0.501558	4.38291	1.38817	6.05011	0.0468646	0.406698	0.11683	0.449347
P10643	Complement system	15	12	Complement component C7 OS=Homo sapiens GN=C7 PE=1 SV=2	0.702105	1.74976	5.32733	9.05759	0.0656035	0.162364	0.448354	0.672715
P07357	Complement system	8	8	Complement component C8 alpha chain OS=Homo sapiens GN=C8A PE=1 SV=2	0.0538283	1.33823	0.229231	1.66974	0.00502962	0.124177	0.0192923	0.124013
P07358	Complement system	13	13	Complement component C8 beta chain OS=Homo sapiens GN=C8B PE=1 SV=3	4.04825	2.41815	1.19443	1.75722	0.378262	0.224384	0.100525	0.13051
P07360	Complement system	9	8	Complement component C8 gamma chain OS=Homo sapiens GN=C8G PE=1 SV=3	7.4896	15.7077	5.36856	16.372	0.699815	1.45755	0.451824	1.21597
P02748	Complement system	23	19	Complement component C9 OS=Homo sapiens GN=C9 PE=1 SV=2	0.74034	3.82935	2.67189	15.6955	0.069176	0.355332	0.224869	1.16571
P00751	Complement system	3	3	Complement factor B OS=Homo sapiens GN=CFB PE=1 SV=2	0.86406	1.59023	1.54703	2.03604	0.0807362	0.14756	0.1302	0.151218
P00746	Complement system	5	4	Complement factor D OS=Homo sapiens GN=CFD PE=1 SV=5	0.426736	0.167424	0.0875097	0.0379004	0.0398734	0.0155356	0.00736491	0.00281489
P08603;Q02985	Complement system	46	37	Complement factor H OS=Homo sapiens GN=CFH PE=1 SV=4	10.6968	15.486	10.7769	19.4665	0.999489	1.43698	0.906997	1.44579
Q03591	Complement system	17	4	Complement factor H-related protein 1 OS=Homo sapiens GN=CFHR1 PE=1 SV=2	23.9644	9.58456	12.6047	10.8495	2.23919	0.889368	1.06082	0.805804
P36980	Complement system	8	2	Complement factor H-related protein 2 OS=Homo sapiens GN=CFHR2 PE=1 SV=1	0.368935	0.147556	0.194051	0.16703	0.0344726	0.013692	0.0163316	0.0124055
Q9BXR6	Complement system	19	17	Complement factor H-related protein 5 OS=Homo sapiens GN=CFHR5 PE=1 SV=1	0.492945	1.24594	4.03602	5.71617	0.0460598	0.115613	0.339675	0.424545
O00602	Complement system	6	6	Ficolin-1 OS=Homo sapiens GN=FCN1 PE=1 SV=2	0.815267	3.84888	0.299441	0.283574	0.0761771	0.357144	0.0252013	0.0210613
Q15485	Complement system	3	3	Ficolin-2 OS=Homo sapiens GN=FCN2 PE=1 SV=2	0.511621	1.48265	1.13578	1.56229	0.047805	0.137577	0.0955886	0.116033
P48740	Complement system	3	1	Mannan-binding lectin serine protease 1 OS=Homo sapiens GN=MASP1 PE=1 SV=3	0.13954	0.206951	0.137719	0.0810997	0.0130384	0.0192034	0.0115906	0.00602335
P27918	Complement system	10	10	Properdin OS=Homo sapiens GN=CFP PE=1 SV=2	2.41175	6.86498	3.45481	11.1733	0.22535	0.637014	0.29076	0.829853
P01876;P01877	Immunoglobulins	11	10	Ig alpha-1 chain C region OS=Homo sapiens GN=IGHA1 PE=1 SV=2	2.89592	4.91002	22.1769	18.7887	0.270589	0.45561	1.86643	1.39545
P01857	Immunoglobulins	13	6	Ig gamma-1 chain C region OS=Homo sapiens GN=IGHG1 PE=1 SV=1	5.55882	8.30524	62.4339	47.6279	0.519406	0.770658	5.2545	3.53736
P01859	Immunoglobulins	11	3	Ig gamma-2 chain C region OS=Homo sapiens GN=IGHG2 PE=1 SV=2	1.02607	2.39268	4.41662	17.9675	0.0958741	0.222021	0.371708	1.33446
P01860	Immunoglobulins	15	6	Ig gamma-3 chain C region OS=Homo sapiens GN=IGHG3 PE=1 SV=2	0.856283	1.93667	7.3895	8.17845	0.0800096	0.179707	0.621908	0.60742
P01861	Immunoglobulins	10	3	Ig gamma-4 chain C region OS=Homo sapiens GN=IGHG4 PE=1 SV=1	7.37972	1.53199	2.50663	5.95043	0.689547	0.142156	0.210961	0.441943
P01834	Immunoglobulins	7	6	Ig kappa chain C region OS=Homo sapiens GN=IGKC PE=1 SV=1	8.70926	14.1903	40.2346	75.57	0.813778	1.31674	3.38619	5.61265
P0CG06;A0M8Q6;B9A064;P0CF74;P0CG04;P0CG05	Immunoglobulins	7	6	Ig lambda-3 chain C regions OS=Homo sapiens GN=IGLC3 PE=1 SV=1	5.62313	8.15244	36.5197	60.2984	0.525415	0.75648	3.07353	4.47841
P01871	Immunoglobulins	19	8	Ig mu chain C region OS=Homo sapiens GN=IGHM PE=1 SV=3	4.18289	4.76307	31.238	22.0294	0.390841	0.441973	2.62902	1.63614
P04220	Immunoglobulins	15	2	Ig mu heavy chain disease protein OS=Homo sapiens PE=1 SV=1	0.430987	0.426696	2.21459	2.11218	0.0402706	0.0395939	0.186382	0.156873
A0A0C4DH31	Immunoglobulins	2	2	Immunoglobulin heavy variable 1-18 OS=Homo sapiens GN=IGHV1-18 PE=3 SV=1	0.12753	0.137109	4.39091	2.98194	0.0119162	0.0127226	0.369543	0.221471
A0A0B4J1V1	Immunoglobulins	3	1	Immunoglobulin heavy variable 3-21 OS=Homo sapiens GN=IGHV3-21 PE=1 SV=1	0.000759052	0.0393983	0	0.339102	7.09245e-05	0.00365584	0	0.0251854
P01764;P01768	Immunoglobulins	3	1	Immunoglobulin heavy variable 3-23 OS=Homo sapiens GN=IGHV3-23 PE=1 SV=2	0.337572	0.182006	1.1852	0.516196	0.0315422	0.0168887	0.0997477	0.0383383
P01825;A0A0C4DH41;P01824;P06331	Immunoglobulins	3	3	Immunoglobulin heavy variable 4-59 OS=Homo sapiens GN=IGHV4-59 PE=1 SV=2	0.595235	0.827444	3.19455	4.27249	0.0556176	0.07678	0.268857	0.317321
A0A0C4DH38	Immunoglobulins	2	2	Immunoglobulin heavy variable 5-51 OS=Homo sapiens GN=IGHV5-51 PE=3 SV=1	0.0451894	0.0248864	1.25177	0.181102	0.00422241	0.00230925	0.10535	0.0134506
P01591	Immunoglobulins	5	5	Immunoglobulin J chain OS=Homo sapiens GN=JCHAIN PE=1 SV=4	0.245509	0.256137	1.7957	0.897235	0.0229399	0.0237674	0.151128	0.0666384
A0A075B6S5	Immunoglobulins	2	2	Immunoglobulin kappa variable 1-27 OS=Homo sapiens GN=IGKV1-27 PE=3 SV=1	0.794116	0.807774	6.90953	3.46587	0.0742008	0.0749548	0.581513	0.257413
A0A075B6S6;P06310	Immunoglobulins	2	2	Immunoglobulin kappa variable 2D-30 OS=Homo sapiens GN=IGKV2D-30 PE=3 SV=1	0.308387	0.468094	1.72107	2.92927	0.0288151	0.0434353	0.144847	0.217559
P01624	Immunoglobulins	2	2	Immunoglobulin kappa variable 3-15 OS=Homo sapiens GN=IGKV3-15 PE=1 SV=2	0.349954	0.325151	2.61617	1.95173	0.0326991	0.0301713	0.220179	0.144956
P01619;A0A0C4DH25	Immunoglobulins	3	1	Immunoglobulin kappa variable 3-20 OS=Homo sapiens GN=IGKV3-20 PE=1 SV=2	2.09731	1.82102	10.8696	20.4347	0.195969	0.168976	0.914796	1.5177
A0A0A0MRZ8;P04433	Immunoglobulins	1	1	Immunoglobulin kappa variable 3D-11 OS=Homo sapiens GN=IGKV3D-11 PE=3 SV=6	0.588136	0.483927	4.22814	1.52159	0.0549544	0.0449044	0.355845	0.11301
P06312	Immunoglobulins	2	1	Immunoglobulin kappa variable 4-1 OS=Homo sapiens GN=IGKV4-1 PE=1 SV=1	0.352503	0.411018	1.28804	1.66493	0.0329372	0.0381391	0.108403	0.123656
P01700	Immunoglobulins	2	2	Immunoglobulin lambda variable 1-47 OS=Homo sapiens GN=IGLV1-47 PE=1 SV=2	0.156218	0.194223	0.956699	1.12167	0.0145968	0.0180223	0.0805168	0.083307
P02647	Lipoproteins	17	16	Apolipoprotein A-I OS=Homo sapiens GN=APOA1 PE=1 SV=1	2.19018	3.12307	7.5326	7.93718	0.204646	0.289795	0.633952	0.589501
P02652	Lipoproteins	4	4	Apolipoprotein A-II OS=Homo sapiens GN=APOA2 PE=1 SV=1	0.132231	0.165619	1.10435	0.40425	0.0123554	0.0153681	0.0929429	0.030024
P06727	Lipoproteins	36	32	Apolipoprotein A-IV OS=Homo sapiens GN=APOA4 PE=1 SV=3	2.58737	3.16668	25.4594	34.3018	0.241759	0.293842	2.14269	2.54762
Q6Q788	Lipoproteins	4	4	Apolipoprotein A-V OS=Homo sapiens GN=APOA5 PE=1 SV=1	0.107844	0.278183	0.598827	0.379976	0.0100767	0.0258131	0.0503979	0.0282211
P04114	Lipoproteins	195	178	Apolipoprotein B-100 OS=Homo sapiens GN=APOB PE=1 SV=2	32.4228	47.1067	18.6034	24.5284	3.02953	4.37111	1.56568	1.82174
P05090	Lipoproteins	5	4	Apolipoprotein D OS=Homo sapiens GN=APOD PE=1 SV=1	0.462515	1.34095	1.59928	1.21746	0.0432165	0.124429	0.134597	0.090422
P02649	Lipoproteins	25	25	Apolipoprotein E OS=Homo sapiens GN=APOE PE=1 SV=1	11.369	7.56468	47.8201	33.378	1.0623	0.70194	4.02459	2.47901
P08519	Lipoproteins	19	18	Apolipoprotein(a) OS=Homo sapiens GN=LPA PE=1 SV=1	3.48182	2.40121	6.56794	3.6108	0.325335	0.222812	0.552764	0.268177
P02749	Lipoproteins	11	10	Beta-2-glycoprotein 1 OS=Homo sapiens GN=APOH PE=1 SV=3	2.95474	3.3877	3.86158	3.21838	0.276086	0.314351	0.324994	0.239032
P10909	Lipoproteins	19	17	Clusterin OS=Homo sapiens GN=CLU PE=1 SV=1	10.8592	20.4851	19.202	19.6854	1.01466	1.90085	1.61606	1.46205
P27169	Lipoproteins	9	9	Serum paraoxonase/arylesterase 1 OS=Homo sapiens GN=PON1 PE=1 SV=3	0.681615	0.328525	4.62779	0.959297	0.0636889	0.0304845	0.38948	0.0712478
Q04917	Other Plasma components	2	1	14-3-3 protein eta OS=Homo sapiens GN=YWHAH PE=1 SV=4	0.0109857	0.0311897	0.0908944	0.141372	0.00102649	0.00289415	0.00764977	0.0104998
P63104;P31946;P61981;P62258	Other Plasma components	7	6	14-3-3 protein zeta/delta OS=Homo sapiens GN=YWHAZ PE=1 SV=1	0.277508	1.42904	0.670602	3.4522	0.0259298	0.132603	0.0564385	0.256397
Q06136	Other Plasma components	3	1	3-ketodihydrosphingosine reductase OS=Homo sapiens GN=KDSR PE=1 SV=1	0.316682	0.0527254	0.0397155	0.00208325	0.0295902	0.00489249	0.0033425	0.000154725
Q9H0F7	Other Plasma components	2	1	ADP-ribosylation factor-like protein 6 OS=Homo sapiens GN=ARL6 PE=1 SV=1	6.80002	13.4894	5.22486	9.64367	0.635381	1.25171	0.439729	0.716243
P04217	Other Plasma components	2	2	Alpha-1B-glycoprotein OS=Homo sapiens GN=A1BG PE=1 SV=4	0.380141	0.781207	0.812931	0.891224	0.0355197	0.0724896	0.0684171	0.0661919
P02765	Other Plasma components	8	8	Alpha-2-HS-glycoprotein OS=Homo sapiens GN=AHSG PE=1 SV=1	1.07392	1.23245	1.34791	1.18137	0.100345	0.114361	0.113441	0.0877414
Q08043;P35609	Other Plasma components	6	3	Alpha-actinin-3 OS=Homo sapiens GN=ACTN3 PE=1 SV=2	2.33943	1.84658	0.871313	1.48612	0.218592	0.171348	0.0733306	0.110375
P06733;P09104;P13929	Other Plasma components	3	3	Alpha-enolase OS=Homo sapiens GN=ENO1 PE=1 SV=2	0.388504	0.620883	1.25222	0.779934	0.0363011	0.0576129	0.105389	0.0579264
Q8WXH4	Other Plasma components	2	2	Ankyrin repeat and SOCS box protein 11 OS=Homo sapiens GN=ASB11 PE=1 SV=1	1.30479	2.10112	4.47996	7.29362	0.121917	0.194967	0.377038	0.541704
P16157	Other Plasma components	34	31	Ankyrin-1 OS=Homo sapiens GN=ANK1 PE=1 SV=3	10.3235	8.55764	8.78765	6.50271	0.964606	0.794078	0.739578	0.482962
P20160	Other Plasma components	5	5	Azurocidin OS=Homo sapiens GN=AZU1 PE=1 SV=3	2.56211	0.614046	1.83437	0.941779	0.239399	0.0569785	0.154383	0.0699467
P12830	Other Plasma components	9	7	Cadherin-1 OS=Homo sapiens GN=CDH1 PE=1 SV=3	0.470138	1.86043	1.60388	2.14059	0.0439288	0.172632	0.134985	0.158984
P55210	Other Plasma components	3	3	Caspase-7 OS=Homo sapiens GN=CASP7 PE=1 SV=1	0.185072	0.511657	0.214484	0.789169	0.0172928	0.0474776	0.0180512	0.0586122
P21926	Other Plasma components	2	1	CD9 antigen OS=Homo sapiens GN=CD9 PE=1 SV=4	0.280543	0.795025	2.26067	1.50799	0.0262134	0.0737718	0.19026	0.112
Q9NV96	Other Plasma components	4	3	Cell cycle control protein 50A OS=Homo sapiens GN=TMEM30A PE=1 SV=1	0.323518	0.450615	0.0824053	0.4804	0.0302289	0.0418134	0.00693531	0.0356797
Q5VT06	Other Plasma components	6	3	Centrosome-associated protein 350 OS=Homo sapiens GN=CEP350 PE=1 SV=1	1.7272	1.52444	0.535167	0.245993	0.161386	0.141456	0.0450402	0.0182701
P11597	Other Plasma components	4	2	Cholesteryl ester transfer protein OS=Homo sapiens GN=CETP PE=1 SV=2	0.184401	0.202998	0.18149	0.119985	0.0172301	0.0188365	0.0152744	0.00891136
O75603	Other Plasma components	3	3	Chorion-specific transcription factor GCMb OS=Homo sapiens GN=GCM2 PE=1 SV=1	0.20697	0.393523	0.0862187	0.143903	0.0193389	0.0365157	0.00725625	0.0106878
P23528;Q9Y281	Other Plasma components	6	5	Cofilin-1 OS=Homo sapiens GN=CFL1 PE=1 SV=3	0.503152	1.22713	0.428633	2.74263	0.0470136	0.113868	0.0360742	0.203697
Q96JN2	Other Plasma components	2	2	Coiled-coil domain-containing protein 136 OS=Homo sapiens GN=CCDC136 PE=1 SV=3	0.997848	0.474159	2.00162	0.350132	0.0932371	0.0439981	0.168459	0.0260046
P39060	Other Plasma components	13	13	Collagen alpha-1(XVIII) chain OS=Homo sapiens GN=COL18A1 PE=1 SV=5	2.05191	0.750639	2.00967	0.846709	0.191727	0.0696532	0.169136	0.0628858
P17540	Other Plasma components	4	3	Creatine kinase S-type, mitochondrial OS=Homo sapiens GN=CKMT2 PE=1 SV=2	0.151108	0.186265	0.238414	0.426005	0.0141193	0.0172839	0.0200652	0.0316397
Q7Z6W7	Other Plasma components	1	1	DnaJ homolog subfamily B member 7 OS=Homo sapiens GN=DNAJB7 PE=2 SV=2	0.187804	0.270092	0	0	0.0175481	0.0250623	0	0
Q96IM9	Other Plasma components	1	1	DPY30 domain-containing protein 2 OS=Homo sapiens GN=DYDC2 PE=2 SV=1	23.0644	23.6493	19.9312	19.0906	2.1551	2.19447	1.67743	1.41788
Q99944	Other Plasma components	2	2	Epidermal growth factor-like protein 8 OS=Homo sapiens GN=EGFL8 PE=1 SV=1	2.09313	1.36971	0.997192	1.40777	0.195578	0.127098	0.0839247	0.104556
P16452	Other Plasma components	14	13	Erythrocyte membrane protein band 4.2 OS=Homo sapiens GN=EPB42 PE=1 SV=3	0.628438	0.232548	2.06725	0.52416	0.0587201	0.0215786	0.173982	0.0389298
P21333	Other Plasma components	59	55	Filamin-A OS=Homo sapiens GN=FLNA PE=1 SV=4	0.97087	1.98307	1.34101	3.88821	0.0907163	0.184013	0.11286	0.28878
Q5TD97	Other Plasma components	2	2	Four and a half LIM domains protein 5 OS=Homo sapiens GN=FHL5 PE=1 SV=1	0.361217	0.178882	0.811965	0.201925	0.0337514	0.0165988	0.0683359	0.0149971
Q8WW33	Other Plasma components	2	2	Gametocyte-specific factor 1 OS=Homo sapiens GN=GTSF1 PE=1 SV=2	4.44171	1.09899	1.40709	0.778273	0.415025	0.101977	0.118422	0.057803
Q9NWU2	Other Plasma components	2	1	Glucose-induced degradation protein 8 homolog OS=Homo sapiens GN=GID8 PE=1 SV=1	0.95087	1.66494	1.78172	0.927286	0.0888476	0.154493	0.149952	0.0688703
P22352	Other Plasma components	2	2	Glutathione peroxidase 3 OS=Homo sapiens GN=GPX3 PE=1 SV=2	0.286846	0.24558	0.126436	0.111888	0.0268024	0.0227878	0.010641	0.00830999
P04899	Other Plasma components	1	1	Guanine nucleotide-binding protein G(i) subunit alpha-2 OS=Homo sapiens GN=GNAI2 PE=1 SV=3	0.0188103	0.0954907	0.0799284	0.185004	0.0017576	0.00886076	0.00672686	0.0137404
P69905	Other Plasma components	3	3	Hemoglobin subunit alpha OS=Homo sapiens GN=HBA1 PE=1 SV=2	1.19208	3.62611	2.0977	6.79045	0.111385	0.336474	0.176545	0.504332
P68871;P02100	Other Plasma components	7	3	Hemoglobin subunit beta OS=Homo sapiens GN=HBB PE=1 SV=2	1.92494	8.01853	3.06145	11.9141	0.179863	0.744054	0.257655	0.88487
P02042	Other Plasma components	7	2	Hemoglobin subunit delta OS=Homo sapiens GN=HBD PE=1 SV=2	0.372884	0.661559	0.394416	0.761216	0.0348416	0.0613873	0.0331945	0.0565361
P02790	Other Plasma components	11	10	Hemopexin OS=Homo sapiens GN=HPX PE=1 SV=2	1.29754	1.90606	4.16483	2.03739	0.12124	0.176867	0.350517	0.151318
Q29960	Other Plasma components	2	1	HLA class I histocompatibility antigen, Cw-16 alpha chain OS=Homo sapiens GN=HLA-C PE=1 SV=1	0.211575	0.500517	0.212186	0.557895	0.0197692	0.0464438	0.0178578	0.0414353
P50221	Other Plasma components	1	1	Homeobox protein MOX-1 OS=Homo sapiens GN=MEOX1 PE=1 SV=1	0.0847177	0.00173683	0.0761199	0.00368687	0.00791587	0.000161164	0.00640633	0.000273827
P18065	Other Plasma components	6	5	Insulin-like growth factor-binding protein 2 OS=Homo sapiens GN=IGFBP2 PE=1 SV=2	0.876337	0.840104	0.396497	0.39115	0.0818833	0.0779547	0.0333696	0.0290511
P17936	Other Plasma components	9	9	Insulin-like growth factor-binding protein 3 OS=Homo sapiens GN=IGFBP3 PE=1 SV=2	3.50663	1.37475	0.677886	1.03439	0.327654	0.127565	0.0570516	0.0768253
P22692	Other Plasma components	6	6	Insulin-like growth factor-binding protein 4 OS=Homo sapiens GN=IGFBP4 PE=1 SV=2	1.60079	0.972676	0.301492	0.207472	0.149575	0.0902563	0.0253739	0.0154091
P24593	Other Plasma components	8	8	Insulin-like growth factor-binding protein 5 OS=Homo sapiens GN=IGFBP5 PE=1 SV=1	1.13494	0.605929	0.520952	0.448274	0.106046	0.0562253	0.0438439	0.0332937
P24592	Other Plasma components	6	6	Insulin-like growth factor-binding protein 6 OS=Homo sapiens GN=IGFBP6 PE=1 SV=1	0.887375	0.212108	0.0434778	0.114893	0.0829147	0.0196819	0.00365913	0.00853323
P35858	Other Plasma components	2	2	Insulin-like growth factor-binding protein complex acid labile subunit OS=Homo sapiens GN=IGFALS PE=1 SV=1	0.00994306	0.043654	0.663392	0.165736	0.000929062	0.00405074	0.0558317	0.0123094
Q14624	Other Plasma components	48	44	Inter-alpha-trypsin inhibitor heavy chain H4 OS=Homo sapiens GN=ITIH4 PE=1 SV=4	34.5575	41.7268	6.50824	4.05652	3.22899	3.8719	0.54774	0.301281
Q5JVS0	Other Plasma components	2	2	Intracellular hyaluronan-binding protein 4 OS=Homo sapiens GN=HABP4 PE=1 SV=1	1.60473	3.25026	0.834983	0.787048	0.149943	0.301597	0.070273	0.0584547
Q643R3	Other Plasma components	1	1	Lysophospholipid acyltransferase LPCAT4 OS=Homo sapiens GN=LPCAT4 PE=1 SV=1	0.00364708	0.163228	0.0620463	0.730241	0.000340777	0.0151462	0.00522188	0.0542356
P61626	Other Plasma components	13	13	Lysozyme C OS=Homo sapiens GN=LYZ PE=1 SV=1	18.2524	3.21952	2.57976	1.84577	1.70547	0.298745	0.217115	0.137087
P35625	Other Plasma components	3	3	Metalloproteinase inhibitor 3 OS=Homo sapiens GN=TIMP3 PE=1 SV=2	0.0418533	0.566367	0.174102	1.23361	0.0039107	0.0525543	0.0146526	0.0916215
Q29980	Other Plasma components	1	1	MHC class I polypeptide-related sequence B OS=Homo sapiens GN=MICB PE=1 SV=1	0.458117	0.762448	3.91982	4.71513	0.0428056	0.0707489	0.329896	0.350197
Q9NPA3	Other Plasma components	1	1	Mid1-interacting protein 1 OS=Homo sapiens GN=MID1IP1 PE=1 SV=1	0.00104698	0.759399	0	0.238609	9.78276e-05	0.070466	0	0.0177217
Q969M1	Other Plasma components	2	2	Mitochondrial import receptor subunit TOM40B OS=Homo sapiens GN=TOMM40L PE=1 SV=1	0.25308	0.165625	1.43859	2.59385	0.0236473	0.0153687	0.121073	0.192647
H3BPM6	Other Plasma components	2	2	MKRN2 opposite strand protein OS=Homo sapiens GN=MKRN2OS PE=4 SV=1	0.21841	0.175184	0.195486	0.412773	0.0204078	0.0162556	0.0164523	0.030657
P05164	Other Plasma components	4	3	Myeloperoxidase OS=Homo sapiens GN=MPO PE=1 SV=1	0.0549235	0.0747761	0.806794	0.178325	0.00513195	0.00693861	0.0679006	0.0132443
Q9BSU3	Other Plasma components	1	1	N-alpha-acetyltransferase 11 OS=Homo sapiens GN=NAA11 PE=1 SV=3	0.235082	0.228638	0.062009	0.0594542	0.0219656	0.0212158	0.00521874	0.00441571
O95157	Other Plasma components	2	2	Neurexophilin-3 OS=Homo sapiens GN=NXPH3 PE=1 SV=3	1.13389	1.91637	1.47324	0.973769	0.105949	0.177824	0.12399	0.0723226
P59666;P59665	Other Plasma components	1	1	Neutrophil defensin 3 OS=Homo sapiens GN=DEFA3 PE=1 SV=1	1.48995	0.823952	1.34814	0.926904	0.139219	0.076456	0.11346	0.0688419
Q96HA1;A8CG34;Q6PJE2	Other Plasma components	1	1	Nuclear envelope pore membrane protein POM 121 OS=Homo sapiens GN=POM121 PE=1 SV=2	1.80345	0.62658	0	0.16018	0.168511	0.0581415	0	0.0118967
P03952;P20718	Other Plasma components	27	24	Plasma kallikrein OS=Homo sapiens GN=KLKB1 PE=1 SV=1	4.02116	1.46045	1.17505	1.07216	0.375729	0.135518	0.0988935	0.0796303
P00747;Q02325;Q15195	Other Plasma components	53	46	Plasminogen OS=Homo sapiens GN=PLG PE=1 SV=2	16.181	3.21584	4.66183	2.23572	1.51192	0.298404	0.392344	0.166049
P16284	Other Plasma components	3	3	Platelet endothelial cell adhesion molecule OS=Homo sapiens GN=PECAM1 PE=1 SV=1	0.0124311	0.186913	0.0552535	0.912877	0.00116154	0.017344	0.0046502	0.0678001
P10720	Other Plasma components	4	2	Platelet factor 4 variant OS=Homo sapiens GN=PF4V1 PE=1 SV=1	1.57939	2.18738	0.108012	0.317309	0.147575	0.202971	0.00909037	0.0235668
P16671	Other Plasma components	5	4	Platelet glycoprotein 4 OS=Homo sapiens GN=CD36 PE=1 SV=2	0.25372	0.829615	1.67835	3.3428	0.0237072	0.0769815	0.141252	0.248273
P13224	Other Plasma components	4	4	Platelet glycoprotein Ib beta chain OS=Homo sapiens GN=GP1BB PE=1 SV=1	1.05783	1.39296	0.741104	2.39933	0.0988422	0.129255	0.0623721	0.1782
P01127	Other Plasma components	4	4	Platelet-derived growth factor subunit B OS=Homo sapiens GN=PDGFB PE=1 SV=1	0.292703	0.461156	0.442837	0.683144	0.0273496	0.0427915	0.0372696	0.0507376
P08567	Other Plasma components	11	10	Pleckstrin OS=Homo sapiens GN=PLEK PE=1 SV=3	0.830296	1.81854	0.8993	2.65456	0.0775814	0.168745	0.075686	0.197157
Q9ULR5	Other Plasma components	1	1	Polyadenylate-binding protein-interacting protein 2B OS=Homo sapiens GN=PAIP2B PE=1 SV=2	0.283193	0.379739	0.34491	0.20796	0.026461	0.0352367	0.029028	0.0154453
Q6S8J3;A5A3E0	Other Plasma components	14	2	POTE ankyrin domain family member E OS=Homo sapiens GN=POTEE PE=2 SV=3	0.127446	0.226505	0.245039	0.60271	0.0119083	0.0210178	0.0206227	0.0447638
P0CG38	Other Plasma components	8	2	POTE ankyrin domain family member I OS=Homo sapiens GN=POTEI PE=3 SV=1	1.24795	2.28472	1.5974	1.76398	0.116606	0.212004	0.134439	0.131012
P11171	Other Plasma components	11	9	Protein 4.1 OS=Homo sapiens GN=EPB41 PE=1 SV=4	0.397755	0.293054	1.89743	0.233622	0.0371655	0.027193	0.159689	0.0173513
P02760	Other Plasma components	12	10	Protein AMBP OS=Homo sapiens GN=AMBP PE=1 SV=1	1.31855	1.09914	0.33967	0.753003	0.123203	0.101991	0.028587	0.0559262
Q8NE31	Other Plasma components	3	3	Protein FAM13C OS=Homo sapiens GN=FAM13C PE=1 SV=2	0.466369	0.500434	0.32766	0.115489	0.0435767	0.0464362	0.0275762	0.00857743
Q9NRJ1	Other Plasma components	1	1	Protein MOST-1 OS=Homo sapiens GN=C8orf17 PE=1 SV=1	0.214601	0.441942	0.00300087	0.014294	0.0200519	0.0410086	0.000252556	0.00106163
O00755	Other Plasma components	2	2	Protein Wnt-7a OS=Homo sapiens GN=WNT7A PE=1 SV=2	0.944354	0.383019	0.417171	0.215854	0.0882387	0.035541	0.0351096	0.0160317
Q9BYX7	Other Plasma components	7	3	Putative beta-actin-like protein 3 OS=Homo sapiens GN=POTEKP PE=5 SV=1	0.230515	0.389933	0.917509	0.651312	0.0215389	0.0361826	0.0772185	0.0483735
Q6NVV9	Other Plasma components	2	1	Putative disintegrin and metalloproteinase domain-containing protein 5 OS=Homo sapiens GN=ADAM5 PE=5 SV=2	0.563005	0.664345	0.00380287	0	0.0526061	0.0616457	0.000320053	0
Q15276	Other Plasma components	3	2	Rab GTPase-binding effector protein 1 OS=Homo sapiens GN=RABEP1 PE=1 SV=2	0.372027	0.370094	0.131978	0.15562	0.0347615	0.0343417	0.0111074	0.011558
Q14699	Other Plasma components	2	2	Raftlin OS=Homo sapiens GN=RFTN1 PE=1 SV=4	0.435566	0.341504	20.7439	0.940246	0.0406985	0.0316887	1.74583	0.0698328
Q15283	Other Plasma components	1	1	Ras GTPase-activating protein 2 OS=Homo sapiens GN=RASA2 PE=1 SV=3	1.49879	1.54803	0.708189	0.271678	0.140045	0.143645	0.059602	0.0201777
P60763;P15153;P63000	Other Plasma components	2	2	Ras-related C3 botulinum toxin substrate 3 OS=Homo sapiens GN=RAC3 PE=1 SV=1	0.651504	0.688235	1.6433	1.07733	0.0608754	0.0638626	0.138302	0.0800139
P61224;A6NIZ1;P62834	Other Plasma components	8	7	Ras-related protein Rap-1b OS=Homo sapiens GN=RAP1B PE=1 SV=1	0.301796	1.32627	0.839783	3.01023	0.0281992	0.123067	0.070677	0.223572
Q99969	Other Plasma components	6	5	Retinoic acid receptor responder protein 2 OS=Homo sapiens GN=RARRES2 PE=1 SV=1	8.7657	0.926103	0.609095	0.286438	0.819051	0.0859348	0.0512621	0.021274
Q12774;A5YM69	Other Plasma components	4	3	Rho guanine nucleotide exchange factor 5 OS=Homo sapiens GN=ARHGEF5 PE=1 SV=3	0.148921	0.33423	2.36332	2.20464	0.0139149	0.0310138	0.1989	0.16374
P34096	Other Plasma components	5	4	Ribonuclease 4 OS=Homo sapiens GN=RNASE4 PE=1 SV=3	1.02772	1.23091	0.437572	0.587002	0.0960283	0.114219	0.0368265	0.0435971
P07998	Other Plasma components	6	6	Ribonuclease pancreatic OS=Homo sapiens GN=RNASE1 PE=1 SV=4	2.38104	0.527755	0.826946	0.510849	0.22248	0.0489713	0.0695966	0.0379412
P49908	Other Plasma components	9	7	Selenoprotein P OS=Homo sapiens GN=SELENOP PE=1 SV=3	5.47051	3.97966	1.63095	0.984204	0.511155	0.36928	0.137262	0.0730977
P02787	Other Plasma components	26	25	Serotransferrin OS=Homo sapiens GN=TF PE=1 SV=3	7.9529	8.04672	13.4169	2.63638	0.743104	0.746669	1.12918	0.195806
P02768	Other Plasma components	61	49	Serum albumin OS=Homo sapiens GN=ALB PE=1 SV=2	45.3269	63.0536	159.513	60.3223	4.23527	5.85086	13.4248	4.48019
Q96EQ0	Other Plasma components	1	1	Small glutamine-rich tetratricopeptide repeat-containing protein beta OS=Homo sapiens GN=SGTB PE=1 SV=1	0.0505717	0.163702	0.231641	0.507031	0.00472533	0.0151902	0.0194952	0.0376576
P11166	Other Plasma components	4	4	Solute carrier family 2, facilitated glucose transporter member 1 OS=Homo sapiens GN=SLC2A1 PE=1 SV=2	0.833627	0.43531	3.14635	0.891379	0.0778926	0.0403932	0.2648	0.0662035
P02549	Other Plasma components	78	71	Spectrin alpha chain, erythrocytic 1 OS=Homo sapiens GN=SPTA1 PE=1 SV=5	8.51678	8.95888	6.61522	5.15444	0.795792	0.831311	0.556744	0.382824
P11277	Other Plasma components	60	52	Spectrin beta chain, erythrocytic OS=Homo sapiens GN=SPTB PE=1 SV=5	0.753885	0.469974	4.86041	1.28039	0.0704416	0.0436097	0.409057	0.0950953
Q8N427	Other Plasma components	4	3	Thioredoxin domain-containing protein 3 OS=Homo sapiens GN=NME8 PE=2 SV=2	3.42456	5.09564	4.06173	4.80211	0.319985	0.472834	0.341839	0.356656
O75674	Other Plasma components	1	1	TOM1-like protein 1 OS=Homo sapiens GN=TOM1L1 PE=1 SV=2	1.47055	1.83717	0.9169	1.16543	0.137406	0.170474	0.0771673	0.0865576
P01137	Other Plasma components	4	4	Transforming growth factor beta-1 OS=Homo sapiens GN=TGFB1 PE=1 SV=2	0.0792183	0.752078	0.106932	0.93751	0.00740202	0.0697867	0.00899949	0.0696296
P37802	Other Plasma components	4	4	Transgelin-2 OS=Homo sapiens GN=TAGLN2 PE=1 SV=3	0.177311	0.965725	1.0335	2.7964	0.0165677	0.0896114	0.0869805	0.207691
P55072	Other Plasma components	4	4	Transitional endoplasmic reticulum ATPase OS=Homo sapiens GN=VCP PE=1 SV=4	0.228472	0.166925	0.554485	0.536317	0.0213481	0.0154893	0.0466661	0.0398327
P02766	Other Plasma components	5	5	Transthyretin OS=Homo sapiens GN=TTR PE=1 SV=1	0.970025	0.701604	1.0791	0.88072	0.0906374	0.0651031	0.0908179	0.0654118
P35030	Other Plasma components	4	2	Trypsin-3 OS=Homo sapiens GN=PRSS3 PE=1 SV=2	0.74231	1.17962	0.669779	0.65977	0.0693601	0.109459	0.0563693	0.0490017
P68363;P68366;Q13748;Q6PEY2;Q71U36	Other Plasma components	4	4	Tubulin alpha-1B chain OS=Homo sapiens GN=TUBA1B PE=1 SV=1	0.425229	0.896631	0.808581	1.0774	0.0397326	0.0832	0.068051	0.0800195
Q9H4B7	Other Plasma components	12	12	Tubulin beta-1 chain OS=Homo sapiens GN=TUBB1 PE=1 SV=1	4.87874	4.02989	1.71385	6.32599	0.45586	0.373941	0.14424	0.469837
P02774	Other Plasma components	18	18	Vitamin D-binding protein OS=Homo sapiens GN=GC PE=1 SV=1	1.09949	4.42674	2.96507	2.66866	0.102734	0.410765	0.249544	0.198203
Q9Y277	Other Plasma components	2	2	Voltage-dependent anion-selective channel protein 3 OS=Homo sapiens GN=VDAC3 PE=1 SV=1	5.17916	5.90371	1.42308	0.215238	0.483931	0.547816	0.119768	0.0159859
P25311	Other Plasma components	4	3	Zinc-alpha-2-glycoprotein OS=Homo sapiens GN=AZGP1 PE=1 SV=2	0.992102	1.53797	0.595626	0.732348	0.0927002	0.142711	0.0501285	0.0543921
P68032;P63267;P68133	Tissue Leakage	18	2	Actin, alpha cardiac muscle 1 OS=Homo sapiens GN=ACTC1 PE=1 SV=1	4.53002	3.72217	2.6181	3.89877	0.423277	0.345387	0.220342	0.289565
P62736	Tissue Leakage	18	2	Actin, aortic smooth muscle OS=Homo sapiens GN=ACTA2 PE=1 SV=1	2.6366	2.04218	2.06986	2.09274	0.246359	0.189498	0.174202	0.155429
P63261;P60709	Tissue Leakage	21	5	Actin, cytoplasmic 2 OS=Homo sapiens GN=ACTG1 PE=1 SV=1	2.15602	10.5922	6.50996	28.7746	0.201455	0.982871	0.547885	2.13711
P61158	Tissue Leakage	4	4	Actin-related protein 3 OS=Homo sapiens GN=ACTR3 PE=1 SV=3	0.154029	0.707067	0.0453515	0.989068	0.0143922	0.06561	0.00381683	0.0734589
P12814	Tissue Leakage	24	13	Alpha-actinin-1 OS=Homo sapiens GN=ACTN1 PE=1 SV=2	0.171249	0.606175	0.804776	1.76732	0.0160012	0.0562481	0.0677308	0.13126
O43707	Tissue Leakage	13	4	Alpha-actinin-4 OS=Homo sapiens GN=ACTN4 PE=1 SV=2	6.12516	9.64402	7.68173	17.6634	0.572324	0.894886	0.646503	1.31188
P03950	Tissue Leakage	6	5	Angiogenin OS=Homo sapiens GN=ANG PE=1 SV=1	5.36817	2.73124	5.31932	9.66906	0.501592	0.253436	0.44768	0.718129
Q562R1	Tissue Leakage	9	3	Beta-actin-like protein 2 OS=Homo sapiens GN=ACTBL2 PE=1 SV=2	0.51291	1.37415	0.933638	2.87984	0.0479254	0.12751	0.0785759	0.213888
P15169	Tissue Leakage	13	13	Carboxypeptidase N catalytic chain OS=Homo sapiens GN=CPN1 PE=1 SV=1	3.68774	1.42856	0.587958	0.349703	0.344576	0.132559	0.0494831	0.0259727
P49662	Tissue Leakage	1	1	Caspase-4 OS=Homo sapiens GN=CASP4 PE=1 SV=1	0.272143	0.468849	1.00745	2.64925	0.0254286	0.0435054	0.0847879	0.196762
O43866	Tissue Leakage	9	9	CD5 antigen-like OS=Homo sapiens GN=CD5L PE=1 SV=1	0.49883	0.484277	3.31727	1.57717	0.0466098	0.0449369	0.279185	0.117138
P27105	Tissue Leakage	10	10	Erythrocyte band 7 integral membrane protein OS=Homo sapiens GN=STOM PE=1 SV=3	1.15169	1.43393	5.82797	2.65224	0.107612	0.133057	0.490488	0.196984
Q86UX7	Tissue Leakage	11	9	Fermitin family homolog 3 OS=Homo sapiens GN=FERMT3 PE=1 SV=1	0.787218	1.71883	0.572552	1.90141	0.0735562	0.159493	0.0481866	0.141219
P30043	Tissue Leakage	9	8	Flavin reductase (NADPH) OS=Homo sapiens GN=BLVRB PE=1 SV=3	1.45689	0.279793	0.609393	0.292679	0.136129	0.0259625	0.0512872	0.0217375
P06396	Tissue Leakage	23	23	Gelsolin OS=Homo sapiens GN=GSN PE=1 SV=1	1.38169	2.32253	0.782014	1.80298	0.129102	0.215512	0.0658151	0.133909
P04406	Tissue Leakage	7	7	Glyceraldehyde-3-phosphate dehydrogenase OS=Homo sapiens GN=GAPDH PE=1 SV=3	0.806306	1.07981	0.800387	1.91544	0.0753397	0.100197	0.0673614	0.142261
Q04756	Tissue Leakage	12	9	Hepatocyte growth factor activator OS=Homo sapiens GN=HGFAC PE=1 SV=1	6.50485	1.58723	1.49603	2.45748	0.607801	0.147282	0.125907	0.182519
Q15323;O76011;O76015	Tissue Leakage	14	1	Keratin, type I cuticular Ha1 OS=Homo sapiens GN=KRT31 PE=1 SV=3	0.0323082	0.297334	1.07174	0.310256	0.00301882	0.0275902	0.0901984	0.023043
Q14532	Tissue Leakage	7	2	Keratin, type I cuticular Ha2 OS=Homo sapiens GN=KRT32 PE=2 SV=3	0.151275	0.500159	0.990218	3.58968	0.0141349	0.0464107	0.0833378	0.266608
Q92764	Tissue Leakage	12	3	Keratin, type I cuticular Ha5 OS=Homo sapiens GN=KRT35 PE=2 SV=5	3.84579	6.63254	2.89528	3.25102	0.359344	0.615445	0.24367	0.241456
O76013	Tissue Leakage	5	2	Keratin, type I cuticular Ha6 OS=Homo sapiens GN=KRT36 PE=2 SV=1	0.0290438	0.170409	0.655232	0.237102	0.0027138	0.0158126	0.055145	0.0176097
P13645;O76014;Q7Z3Z0	Tissue Leakage	33	26	Keratin, type I cytoskeletal 10 OS=Homo sapiens GN=KRT10 PE=1 SV=6	3.85542	4.94921	4.80531	9.0245	0.360244	0.459246	0.40442	0.670257
P13646	Tissue Leakage	9	2	Keratin, type I cytoskeletal 13 OS=Homo sapiens GN=KRT13 PE=1 SV=4	0.347642	0.330856	0.308787	0.203154	0.032483	0.0307007	0.0259878	0.0150884
P02533	Tissue Leakage	13	2	Keratin, type I cytoskeletal 14 OS=Homo sapiens GN=KRT14 PE=1 SV=4	0.337652	0.198464	0.562804	0.300726	0.0315496	0.0184158	0.0473662	0.0223352
P19012	Tissue Leakage	13	7	Keratin, type I cytoskeletal 15 OS=Homo sapiens GN=KRT15 PE=1 SV=3	1.00462	0.663845	2.42472	0.754626	0.0938703	0.0615994	0.204067	0.0560467
P08779	Tissue Leakage	13	6	Keratin, type I cytoskeletal 16 OS=Homo sapiens GN=KRT16 PE=1 SV=4	1.80223	5.27474	0.658895	2.78388	0.168397	0.489453	0.0554533	0.206761
Q04695	Tissue Leakage	11	2	Keratin, type I cytoskeletal 17 OS=Homo sapiens GN=KRT17 PE=1 SV=2	0.141818	0.131429	0.678556	0.14945	0.0132512	0.0121956	0.0571079	0.0110998
P05783	Tissue Leakage	7	6	Keratin, type I cytoskeletal 18 OS=Homo sapiens GN=KRT18 PE=1 SV=2	1.38405	2.82279	4.95065	15.0455	0.129324	0.261932	0.416652	1.11744
P08727	Tissue Leakage	7	2	Keratin, type I cytoskeletal 19 OS=Homo sapiens GN=KRT19 PE=1 SV=4	0.14667	0.239159	0.462477	0.467519	0.0137046	0.022192	0.0389226	0.034723
Q2M2I5	Tissue Leakage	4	2	Keratin, type I cytoskeletal 24 OS=Homo sapiens GN=KRT24 PE=1 SV=1	0.150044	0.200187	0.197186	0.259582	0.0140198	0.0185757	0.0165954	0.0192794
Q6A163	Tissue Leakage	2	2	Keratin, type I cytoskeletal 39 OS=Homo sapiens GN=KRT39 PE=1 SV=2	3.98554	4.3879	0.72632	0.588003	0.372402	0.407161	0.0611278	0.0436715
P35527	Tissue Leakage	28	24	Keratin, type I cytoskeletal 9 OS=Homo sapiens GN=KRT9 PE=1 SV=3	2.82861	3.62965	5.68391	8.40103	0.2643	0.336801	0.478364	0.623951
Q9NSB4	Tissue Leakage	2	1	Keratin, type II cuticular Hb2 OS=Homo sapiens GN=KRT82 PE=3 SV=3	0.122098	0.298611	1.28583	0.17344	0.0114086	0.0277087	0.108217	0.0128815
P78385;A6NCN2	Tissue Leakage	11	1	Keratin, type II cuticular Hb3 OS=Homo sapiens GN=KRT83 PE=1 SV=2	0.0386109	0.155216	1.1976	0.404664	0.00360773	0.0144028	0.100791	0.0300547
P78386	Tissue Leakage	9	2	Keratin, type II cuticular Hb5 OS=Homo sapiens GN=KRT85 PE=1 SV=1	0.254294	0.258499	2.65467	0.122061	0.0237607	0.0239866	0.22342	0.00906556
O43790;Q14533;Q9NSB2	Tissue Leakage	13	2	Keratin, type II cuticular Hb6 OS=Homo sapiens GN=KRT86 PE=1 SV=1	0.152872	0.7364	1.70251	2.91372	0.0142841	0.0683318	0.143285	0.216404
P04264	Tissue Leakage	32	27	Keratin, type II cytoskeletal 1 OS=Homo sapiens GN=KRT1 PE=1 SV=6	4.37175	4.3659	8.00941	9.42694	0.408489	0.405119	0.67408	0.700147
Q7Z794	Tissue Leakage	8	6	Keratin, type II cytoskeletal 1b OS=Homo sapiens GN=KRT77 PE=2 SV=3	0.380996	0.537971	0.706418	0.697946	0.0355996	0.0499193	0.0594529	0.051837
P35908;O95678;Q5XKE5	Tissue Leakage	27	19	Keratin, type II cytoskeletal 2 epidermal OS=Homo sapiens GN=KRT2 PE=1 SV=2	1.22784	1.1684	2.68748	4.45689	0.114727	0.108418	0.226181	0.331017
Q01546	Tissue Leakage	5	1	Keratin, type II cytoskeletal 2 oral OS=Homo sapiens GN=KRT76 PE=1 SV=2	0.218615	0.775156	0.929718	1.89386	0.020427	0.0719282	0.0782461	0.140658
P19013	Tissue Leakage	3	1	Keratin, type II cytoskeletal 4 OS=Homo sapiens GN=KRT4 PE=1 SV=4	9.90263	14.8444	9.1774	14.5318	0.925284	1.37744	0.772379	1.07929
P13647	Tissue Leakage	12	6	Keratin, type II cytoskeletal 5 OS=Homo sapiens GN=KRT5 PE=1 SV=3	0.379681	0.511524	0.291124	0.678671	0.0354767	0.0474652	0.0245013	0.0504054
P02538;P12035;P48668	Tissue Leakage	19	3	Keratin, type II cytoskeletal 6A OS=Homo sapiens GN=KRT6A PE=1 SV=3	0.667804	0.483941	0.569322	0.634456	0.0623984	0.0449057	0.0479148	0.0471216
P05787	Tissue Leakage	1	1	Keratin, type II cytoskeletal 8 OS=Homo sapiens GN=KRT8 PE=1 SV=7	0.10158	0.157954	0.0344138	0.00977858	0.00949145	0.0146568	0.0028963	0.000726263
P02788	Tissue Leakage	22	20	Lactotransferrin OS=Homo sapiens GN=LTF PE=1 SV=6	1.95925	4.02701	7.1069	14.3569	0.183069	0.373673	0.598124	1.0663
Q14766	Tissue Leakage	13	12	Latent-transforming growth factor beta-binding protein 1 OS=Homo sapiens GN=LTBP1 PE=1 SV=4	0.325686	1.18243	0.488506	1.19577	0.0304315	0.109719	0.0411132	0.0888111
O14960	Tissue Leakage	2	2	Leukocyte cell-derived chemotaxin-2 OS=Homo sapiens GN=LECT2 PE=1 SV=2	2.40231	1.06675	0.37778	0.162538	0.224467	0.0989853	0.0317944	0.0120718
P33241	Tissue Leakage	1	1	Lymphocyte-specific protein 1 OS=Homo sapiens GN=LSP1 PE=1 SV=1	2.19515	0.524173	0.482334	0.435324	0.205111	0.0486389	0.0405938	0.0323319
Q96PD5	Tissue Leakage	1	1	N-acetylmuramoyl-L-alanine amidase OS=Homo sapiens GN=PGLYRP2 PE=1 SV=1	0.127274	0.200559	0.173462	0.238441	0.0118922	0.0186102	0.0145987	0.0177092
P62937	Tissue Leakage	2	2	Peptidyl-prolyl cis-trans isomerase A OS=Homo sapiens GN=PPIA PE=1 SV=2	0.565137	1.36241	0.494701	1.6504	0.0528054	0.126421	0.0416346	0.122576
P0CG39	Tissue Leakage	7	1	POTE ankyrin domain family member J OS=Homo sapiens GN=POTEJ PE=3 SV=1	0.0714098	0.133773	0.115648	0.200562	0.0066724	0.0124131	0.00973303	0.0148959
Q15113	Tissue Leakage	20	17	Procollagen C-endopeptidase enhancer 1 OS=Homo sapiens GN=PCOLCE PE=1 SV=2	6.41984	0.744499	1.6611	1.12987	0.599858	0.0690834	0.1398	0.0839162
P07737	Tissue Leakage	6	6	Profilin-1 OS=Homo sapiens GN=PFN1 PE=1 SV=2	0.513848	1.49409	0.656456	4.15656	0.048013	0.138639	0.055248	0.308711
P12273	Tissue Leakage	7	7	Prolactin-inducible protein OS=Homo sapiens GN=PIP PE=1 SV=1	0.089963	1.32598	0.25967	0.515374	0.00840598	0.12304	0.0218541	0.0382772
Q92954	Tissue Leakage	29	28	Proteoglycan 4 OS=Homo sapiens GN=PRG4 PE=1 SV=2	4.02521	4.25251	0.925577	1.57953	0.376108	0.394598	0.0778975	0.117313
P59190	Tissue Leakage	1	1	Ras-related protein Rab-15 OS=Homo sapiens GN=RAB15 PE=1 SV=1	0.30216	0.595739	0.741535	1.45493	0.0282332	0.0552797	0.0624083	0.108059
O00391	Tissue Leakage	9	8	Sulfhydryl oxidase 1 OS=Homo sapiens GN=QSOX1 PE=1 SV=3	0.295346	0.173401	0.491081	0.351351	0.0275966	0.0160902	0.0413299	0.0260952
Q9Y490	Tissue Leakage	54	51	Talin-1 OS=Homo sapiens GN=TLN1 PE=1 SV=3	1.87091	3.96778	0.413438	2.25033	0.174814	0.368177	0.0347954	0.167134
P10646	Tissue Leakage	1	1	Tissue factor pathway inhibitor OS=Homo sapiens GN=TFPI PE=1 SV=1	0.241951	0.488964	0.187135	0.0840261	0.0226075	0.0453719	0.0157495	0.00624069
Q96A61	Tissue Leakage	1	1	Tripartite motif-containing protein 52 OS=Homo sapiens GN=TRIM52 PE=1 SV=1	0.298104	0.689129	1.29014	1.29494	0.0278543	0.0639455	0.108579	0.0961766
P18206	Tissue Leakage	21	20	Vinculin OS=Homo sapiens GN=VCL PE=1 SV=4	2.20266	2.16122	3.62867	2.9615	0.205812	0.200544	0.305393	0.219953
P04004	Tissue Leakage	23	22	Vitronectin OS=Homo sapiens GN=VTN PE=1 SV=1	78.6164	116.495	20.0755	37.6118	7.34577	10.8098	1.68957	2.79346

## Sheet: HSA
					Amount in fmol				Amount in %						Amount in %
					HSA-TAD		HSA-TDI		HSA-TAD		HSA-TDI				HSA-TAD		HSA-TDI
Accession	Annotation	Peptide count	Unique peptides	Description	Plasma	Serum	Plasma	Serum	Plasma	Serum	Plasma	Serum			Plasma	Serum	Plasma	Serum
P01011	Acute Phase	6	4	Alpha-1-antichymotrypsin OS=Homo sapiens GN=SERPINA3 PE=1 SV=2	0.925107	0.456584	0.270463	0.794718	0.277112	0.2399	0.0911992	0.153683		Acute Phase	2.29193	3.76561	4.65505	3.52505
P01009	Acute Phase	10	9	Alpha-1-antitrypsin OS=Homo sapiens GN=SERPINA1 PE=1 SV=3	0.458324	0.397671	0.449113	1.14004	0.137289	0.208946	0.151439	0.220461		Coagulation	27.8986	18.2678	6.88709	6.02789
P01023	Acute Phase	15	13	Alpha-2-macroglobulin OS=Homo sapiens GN=A2M PE=1 SV=3	0.694467	0.948369	3.00435	4.7761	0.208024	0.498296	1.01306	0.923603		Complement system	6.10002	13.775	14.8779	13.2189
P02751	Acute Phase	34	27	Fibronectin OS=Homo sapiens GN=FN1 PE=1 SV=4	0.82941	0.879124	2.42914	2.70851	0.248446	0.461913	0.819097	0.523772		Immunoglobulins	5.91004	4.95589	17.4971	21.4167
P00738	Acute Phase	12	5	Haptoglobin OS=Homo sapiens GN=HP PE=1 SV=1	0.796506	0.661551	3.77763	3.61119	0.23859	0.347595	1.2738	0.698333		Lipoproteins	11.7605	8.83558	12.5865	10.9872
P00739	Acute Phase	11	4	Haptoglobin-related protein OS=Homo sapiens GN=HPR PE=2 SV=2	0.874774	0.867336	1.68621	2.81086	0.262035	0.455719	0.568584	0.543565		Serum albumin	10.9496	10.628	10.8249	16.7253
P18428	Acute Phase	8	8	Lipopolysaccharide-binding protein OS=Homo sapiens GN=LBP PE=1 SV=3	0.399643	0.258884	0.365136	0.467631	0.119711	0.136024	0.123122	0.0904307		Other proteins	16.616	21.5658	17.2352	14.3863
P02775	Acute Phase	5	5	Platelet basic protein OS=Homo sapiens GN=PPBP PE=1 SV=3	1.91702	2.04333	0.631957	1.46308	0.574234	1.07362	0.213093	0.282931		Tissue Leakage	18.4732	18.2063	15.4362	13.7127
P0DJI8	Acute Phase	6	3	Serum amyloid A-1 protein OS=Homo sapiens GN=SAA1 PE=1 SV=1	0.575844	0.322034	1.01168	0.296505	0.172491	0.169204	0.341133	0.0573382
P02743	Acute Phase	6	6	Serum amyloid P-component OS=Homo sapiens GN=APCS PE=1 SV=2	0.180278	0.331917	0.179497	0.159972	0.0540016	0.174397	0.0605257	0.0309355			100	100	100	100
P01008	Coagulation	27	27	Antithrombin-III OS=Homo sapiens GN=SERPINC1 PE=1 SV=1	1.37424	1.98603	0.898283	4.27286	0.411648	1.04351	0.302898	0.826287
Q96IY4	Coagulation	12	12	Carboxypeptidase B2 OS=Homo sapiens GN=CPB2 PE=1 SV=2	0.543654	1.42524	0.302333	0.720095	0.162849	0.748858	0.101946	0.139252
P12259	Coagulation	57	51	Coagulation factor V OS=Homo sapiens GN=F5 PE=1 SV=4	0.452882	1.48157	1.81405	2.42216	0.135659	0.778451	0.611689	0.468398
P03951	Coagulation	35	30	Coagulation factor XI OS=Homo sapiens GN=F11 PE=1 SV=1	9.92674	2.98666	0.672605	0.900149	2.97351	1.56926	0.2268	0.174071
P00488	Coagulation	12	8	Coagulation factor XIII A chain OS=Homo sapiens GN=F13A1 PE=1 SV=4	0.585918	0.318496	0.711204	0.982961	0.175509	0.167345	0.239815	0.190085
P02671	Coagulation	32	27	Fibrinogen alpha chain OS=Homo sapiens GN=FGA PE=1 SV=2	18.8375	2.93598	3.55341	1.96457	5.64268	1.54264	1.1982	0.379909
P02675	Coagulation	26	23	Fibrinogen beta chain OS=Homo sapiens GN=FGB PE=1 SV=2	5.3171	0.667613	1.41004	2.42667	1.59271	0.35078	0.475461	0.469269
P02679	Coagulation	23	21	Fibrinogen gamma chain OS=Homo sapiens GN=FGG PE=1 SV=3	5.90924	0.330396	1.86912	0.222965	1.77009	0.173598	0.63026	0.043117
P23142	Coagulation	5	4	Fibulin-1 OS=Homo sapiens GN=FBLN1 PE=1 SV=4	0.20272	0.0991656	0.181588	0.181574	0.060724	0.052104	0.0612308	0.0351128
P04196	Coagulation	18	17	Histidine-rich glycoprotein OS=Homo sapiens GN=HRG PE=1 SV=1	6.35258	1.04382	0.401571	0.371433	1.90289	0.548449	0.135408	0.0718278
P08514	Coagulation	22	21	Integrin alpha-IIb OS=Homo sapiens GN=ITGA2B PE=1 SV=3	4.47928	2.747	2.08994	4.21898	1.34175	1.44334	0.70472	0.815867
P05106	Coagulation	18	17	Integrin beta-3 OS=Homo sapiens GN=ITGB3 PE=1 SV=2	0.618274	0.696904	0.768678	1.63698	0.185201	0.36617	0.259195	0.316559
P01042	Coagulation	26	24	Kininogen-1 OS=Homo sapiens GN=KNG1 PE=1 SV=2	20.8806	4.59368	0.511163	0.856556	6.25469	2.41363	0.172362	0.165641
Q13201	Coagulation	12	10	Multimerin-1 OS=Homo sapiens GN=MMRN1 PE=1 SV=3	1.8875	0.964379	0.587596	0.460085	0.565393	0.506708	0.198135	0.0889713
P03952	Coagulation	16	16	Plasma kallikrein OS=Homo sapiens GN=KLKB1 PE=1 SV=1	0.487613	0.274266	0.293212	0.338368	0.146062	0.144106	0.09887	0.0654337
P05154	Coagulation	16	15	Plasma serine protease inhibitor OS=Homo sapiens GN=SERPINA5 PE=1 SV=3	5.57805	1.55083	2.04188	3.72902	1.67088	0.814842	0.688515	0.721119
P00747	Coagulation	29	27	Plasminogen OS=Homo sapiens GN=PLG PE=1 SV=2	1.1302	0.917367	0.502153	0.537519	0.338547	0.482007	0.169324	0.103946
P02776;P10720	Coagulation	5	5	Platelet factor 4 OS=Homo sapiens GN=PF4 PE=1 SV=2	7.77601	7.09832	0.698134	1.3758	2.32927	3.72963	0.235408	0.266053
P00734	Coagulation	22	21	Prothrombin OS=Homo sapiens GN=F2 PE=1 SV=2	0.796307	2.65003	1.11764	3.55243	0.23853	1.39239	0.376863	0.68697
P02730	Complement system	18	17	Band 3 anion transport protein OS=Homo sapiens GN=SLC4A1 PE=1 SV=3	2.18516	0.432708	0.75107	0.274051	0.654555	0.227356	0.253258	0.052996
P04003	Complement system	14	10	C4b-binding protein alpha chain OS=Homo sapiens GN=C4BPA PE=1 SV=2	0.46114	0.524871	2.6754	3.1034	0.138133	0.27578	0.902134	0.600137
P02745	Complement system	4	3	Complement C1q subcomponent subunit A OS=Homo sapiens GN=C1QA PE=1 SV=2	0.600565	0.180601	2.9392	1.02927	0.179897	0.094892	0.991086	0.19904
P02746	Complement system	7	7	Complement C1q subcomponent subunit B OS=Homo sapiens GN=C1QB PE=1 SV=3	0.116138	0.179157	1.43987	0.28443	0.0347888	0.0941334	0.485518	0.0550031
P02747	Complement system	4	4	Complement C1q subcomponent subunit C OS=Homo sapiens GN=C1QC PE=1 SV=3	0.494739	0.378177	3.26744	2.91724	0.148197	0.198703	1.10177	0.564136
P09871	Complement system	1	1	Complement C1s subcomponent OS=Homo sapiens GN=C1S PE=1 SV=1	0.00589994	0.00439079	0.0120342	0	0.0017673	0.00230703	0.00405789	0
P01024;O95568	Complement system	132	128	Complement C3 OS=Homo sapiens GN=C3 PE=1 SV=2	1.32254	8.46991	11.5555	31.2136	0.396162	4.45029	3.89647	6.0361
P0C0L4	Complement system	44	4	Complement C4-A OS=Homo sapiens GN=C4A PE=1 SV=2	0.23557	0.151855	3.48062	2.19721	0.0705639	0.0797884	1.17365	0.424898
P0C0L5	Complement system	45	4	Complement C4-B OS=Homo sapiens GN=C4B PE=1 SV=2	0.324359	0.224605	4.31923	2.6855	0.0971603	0.118013	1.45643	0.519323
P01031	Complement system	53	50	Complement C5 OS=Homo sapiens GN=C5 PE=1 SV=4	0.644551	1.0085	0.759202	1.11789	0.193072	0.529889	0.256	0.216177
P13671	Complement system	28	26	Complement component C6 OS=Homo sapiens GN=C6 PE=1 SV=3	0.134906	0.682594	0.337528	1.66918	0.0404105	0.358651	0.113813	0.322786
P10643	Complement system	27	25	Complement component C7 OS=Homo sapiens GN=C7 PE=1 SV=2	0.392687	0.946746	0.661447	1.09693	0.117628	0.497443	0.223037	0.212125
P07357	Complement system	14	13	Complement component C8 alpha chain OS=Homo sapiens GN=C8A PE=1 SV=2	0.833335	0.799329	0.554321	0.807044	0.249622	0.419987	0.186915	0.156066
P07358	Complement system	22	20	Complement component C8 beta chain OS=Homo sapiens GN=C8B PE=1 SV=3	2.35227	1.68986	1.77849	1.80282	0.704611	0.887895	0.5997	0.34863
P07360	Complement system	7	6	Complement component C8 gamma chain OS=Homo sapiens GN=C8G PE=1 SV=3	0.211481	0.681991	0.33966	0.71657	0.0633483	0.358335	0.114532	0.13857
P02748	Complement system	29	28	Complement component C9 OS=Homo sapiens GN=C9 PE=1 SV=2	0.335852	3.22604	1.43699	4.84206	0.100603	1.69504	0.484547	0.936359
P00751	Complement system	12	11	Complement factor B OS=Homo sapiens GN=CFB PE=1 SV=2	0.348941	0.383615	0.189704	0.338441	0.104524	0.201561	0.0639676	0.0654479
P08603	Complement system	38	30	Complement factor H OS=Homo sapiens GN=CFH PE=1 SV=4	1.22219	0.884183	3.03909	4.4644	0.366102	0.464571	1.02477	0.863326
Q03591	Complement system	13	3	Complement factor H-related protein 1 OS=Homo sapiens GN=CFHR1 PE=1 SV=2	6.28999	1.9548	0.826423	1.65187	1.88414	1.0271	0.278667	0.319439
P36980	Complement system	7	2	Complement factor H-related protein 2 OS=Homo sapiens GN=CFHR2 PE=1 SV=1	0.312492	0.135635	0.0916439	0.0504831	0.0936055	0.0712661	0.030902	0.00976244
Q9BXR6	Complement system	24	19	Complement factor H-related protein 5 OS=Homo sapiens GN=CFHR5 PE=1 SV=1	0.645046	1.12928	2.02199	3.34248	0.193221	0.593349	0.681807	0.64637
O00602	Complement system	3	3	Ficolin-1 OS=Homo sapiens GN=FCN1 PE=1 SV=2	0.246968	0.347153	0.0955261	0.0145464	0.0739783	0.182403	0.032211	0.00281298
P05155	Complement system	2	2	Plasma protease C1 inhibitor OS=Homo sapiens GN=SERPING1 PE=1 SV=2	0.00822635	0.0164207	0.00213926	0.00066231	0.00246417	0.00862783	0.000721351	0.000128078
P27918	Complement system	9	6	Properdin OS=Homo sapiens GN=CFP PE=1 SV=2	0.639189	1.78446	1.548	2.73688	0.191466	0.937601	0.521978	0.529258
P01876	Immunoglobulins	12	4	Ig alpha-1 chain C region OS=Homo sapiens GN=IGHA1 PE=1 SV=2	2.33796	0.949529	3.0921	4.11191	0.700326	0.498906	1.04264	0.795162
P01877	Immunoglobulins	8	1	Ig alpha-2 chain C region OS=Homo sapiens GN=IGHA2 PE=1 SV=3	0.140781	0.167301	0.563456	0.566328	0.0421702	0.0879041	0.189995	0.109517
P01857	Immunoglobulins	12	4	Ig gamma-1 chain C region OS=Homo sapiens GN=IGHG1 PE=1 SV=1	3.60806	1.835	7.25619	18.009	1.08078	0.964155	2.44676	3.48259
P01859	Immunoglobulins	11	4	Ig gamma-2 chain C region OS=Homo sapiens GN=IGHG2 PE=1 SV=2	1.21942	1.05067	6.9899	13.5842	0.365273	0.552046	2.35697	2.62691
P01860	Immunoglobulins	14	3	Ig gamma-3 chain C region OS=Homo sapiens GN=IGHG3 PE=1 SV=2	0.404022	0.239534	1.04252	0.999152	0.121023	0.125857	0.351534	0.193216
P01834	Immunoglobulins	6	6	Ig kappa chain C region OS=Homo sapiens GN=IGKC PE=1 SV=1	7.34791	2.30351	17.8144	51.768	2.20103	1.21032	6.00695	10.0109
P0CG06;A0M8Q6;P0CF74;P0CG05	Immunoglobulins	5	1	Ig lambda-3 chain C regions OS=Homo sapiens GN=IGLC3 PE=1 SV=1	0.640611	0.544074	4.16283	3.59316	0.191892	0.28587	1.40369	0.694847
P01871;P04220	Immunoglobulins	18	18	Ig mu chain C region OS=Homo sapiens GN=IGHM PE=1 SV=3	2.24033	0.810855	6.20751	12.0312	0.671082	0.426043	2.09315	2.32659
A0A0B4J1V2	Immunoglobulins	2	1	Immunoglobulin heavy variable 2-26 OS=Homo sapiens GN=IGHV2-26 PE=3 SV=1	0.0167651	0.002825	0	0	0.00502191	0.00148432	0	0
P01764	Immunoglobulins	3	1	Immunoglobulin heavy variable 3-23 OS=Homo sapiens GN=IGHV3-23 PE=1 SV=2	0.029216	0.0477247	0.300119	0.52845	0.00875152	0.0250757	0.101199	0.102192
A0A0B4J1X5;A0A0B4J1V1;A0A0B4J1X8;A0A0C4DH42;P01762;P01763;P01767;P01768;P01772;P01780	Immunoglobulins	3	2	Immunoglobulin heavy variable 3-74 OS=Homo sapiens GN=IGHV3-74 PE=3 SV=1	0.322276	0.535038	0.602711	1.58544	0.0965363	0.281122	0.203232	0.306592
P01825;A0A0C4DH41;P01824;P06331	Immunoglobulins	2	2	Immunoglobulin heavy variable 4-59 OS=Homo sapiens GN=IGHV4-59 PE=1 SV=2	0.628799	0.124786	0.225301	0.271457	0.188354	0.0655658	0.0759705	0.0524945
P01591	Immunoglobulins	4	4	Immunoglobulin J chain OS=Homo sapiens GN=JCHAIN PE=1 SV=4	0.17145	0.233761	0.461172	1.10666	0.0513571	0.122823	0.155505	0.214006
A0A075B6S2;A0A0A0MRZ7	Immunoglobulins	2	2	Immunoglobulin kappa variable 2D-29 OS=Homo sapiens GN=IGKV2D-29 PE=3 SV=1	0.075123	0.080734	0.250867	0.100003	0.0225028	0.0424196	0.0845915	0.0193386
P01619;A0A0C4DH25	Immunoglobulins	2	2	Immunoglobulin kappa variable 3-20 OS=Homo sapiens GN=IGKV3-20 PE=1 SV=2	0.148195	0.16788	0.327659	0.256021	0.0443913	0.088208	0.110485	0.0495094
B9A064;P0CG04	Immunoglobulins	6	2	Immunoglobulin lambda-like polypeptide 5 OS=Homo sapiens GN=IGLL5 PE=2 SV=2	0.399087	0.338946	2.59335	2.23846	0.119545	0.178091	0.874469	0.432875
P02647	Lipoproteins	21	20	Apolipoprotein A-I OS=Homo sapiens GN=APOA1 PE=1 SV=1	2.48038	2.18296	3.8931	4.77132	0.742986	1.14698	1.31274	0.922679
P06727	Lipoproteins	23	21	Apolipoprotein A-IV OS=Homo sapiens GN=APOA4 PE=1 SV=3	0.84317	0.93818	1.3928	2.67557	0.252568	0.492943	0.469647	0.517403
P04114	Lipoproteins	197	185	Apolipoprotein B-100 OS=Homo sapiens GN=APOB PE=1 SV=2	9.47527	6.70699	21.0468	32.8498	2.83828	3.52401	7.09691	6.3525
P55056	Lipoproteins	2	2	Apolipoprotein C-IV OS=Homo sapiens GN=APOC4 PE=1 SV=1	0.125684	0.0188772	0.000944363	0.00853505	0.037648	0.00991855	0.000318435	0.00165051
P05090	Lipoproteins	4	1	Apolipoprotein D OS=Homo sapiens GN=APOD PE=1 SV=1	0.223148	0.053721	0.0432861	0.126672	0.0668429	0.0282263	0.0145959	0.0244959
P02649	Lipoproteins	25	23	Apolipoprotein E OS=Homo sapiens GN=APOE PE=1 SV=1	19.749	2.9528	3.646	2.73466	5.91572	1.55147	1.22942	0.528828
P08519	Lipoproteins	28	24	Apolipoprotein(a) OS=Homo sapiens GN=LPA PE=1 SV=1	2.63075	1.48279	4.62821	8.46568	0.78803	0.779095	1.56061	1.6371
P02749	Lipoproteins	10	9	Beta-2-glycoprotein 1 OS=Homo sapiens GN=APOH PE=1 SV=3	1.19574	0.626026	0.355181	1.05076	0.358179	0.328929	0.119766	0.203195
P10909	Lipoproteins	17	14	Clusterin OS=Homo sapiens GN=CLU PE=1 SV=1	2.29178	1.73564	2.08342	3.90736	0.686493	0.911947	0.702523	0.755606
P27169	Lipoproteins	1	1	Serum paraoxonase/arylesterase 1 OS=Homo sapiens GN=PON1 PE=1 SV=3	0.246339	0.118101	0.237268	0.226225	0.0737897	0.062053	0.0800058	0.0437475
Q9P2J9	Other Plasma components	3	1	[Pyruvate dehydrogenase [acetyl-transferring]]-phosphatase 2, mitochondrial OS=Homo sapiens GN=PDP2 PE=2 SV=2	0.0250179	0.00946317	0.0286996	0.297395	0.00749401	0.00497218	0.00967738	0.0575103
P31946;P61981	Other Plasma components	3	1	14-3-3 protein beta/alpha OS=Homo sapiens GN=YWHAB PE=1 SV=3	0.0028227	0.0547778	0.00219507	0.00563824	0.000845527	0.0287816	0.000740168	0.00109032
Q04917	Other Plasma components	4	1	14-3-3 protein eta OS=Homo sapiens GN=YWHAH PE=1 SV=4	0.138305	0.339346	0.414674	0.309919	0.0414287	0.178301	0.139826	0.0599323
P27348	Other Plasma components	3	1	14-3-3 protein theta OS=Homo sapiens GN=YWHAQ PE=1 SV=1	0.00855796	0.00919369	0.0787207	0.0182599	0.0025635	0.00483059	0.0265443	0.00353111
P63104;P31947	Other Plasma components	8	6	14-3-3 protein zeta/delta OS=Homo sapiens GN=YWHAZ PE=1 SV=1	0.141425	0.514266	0.26223	0.240576	0.0423632	0.270208	0.0884231	0.0465227
P02763;P19652	Other Plasma components	7	5	Alpha-1-acid glycoprotein 1 OS=Homo sapiens GN=ORM1 PE=1 SV=1	0.196344	0.318939	0.162446	0.652253	0.058814	0.167579	0.0547762	0.126133
P12814;P35609	Other Plasma components	28	17	Alpha-actinin-1 OS=Homo sapiens GN=ACTN1 PE=1 SV=2	0.351722	0.341175	0.270701	0.131175	0.105357	0.179262	0.0912792	0.0253666
P02771	Other Plasma components	1	1	Alpha-fetoprotein OS=Homo sapiens GN=AFP PE=1 SV=1	0.319356	0.086098	0.0162461	0.0170009	0.0956618	0.045238	0.00547813	0.00328764
Q9C0B1	Other Plasma components	3	3	Alpha-ketoglutarate-dependent dioxygenase FTO OS=Homo sapiens GN=FTO PE=1 SV=3	0.829961	0.636034	0.854889	1.2584	0.248611	0.334188	0.288265	0.243349
P16157	Other Plasma components	21	18	Ankyrin-1 OS=Homo sapiens GN=ANK1 PE=1 SV=3	2.08454	0.65158	0.197527	0.191269	0.624414	0.342356	0.0666053	0.0369876
P20160	Other Plasma components	1	1	Azurocidin OS=Homo sapiens GN=AZU1 PE=1 SV=3	0.626906	0.12141	0.0595916	0.0526498	0.187787	0.0637917	0.0200941	0.0101814
O95817	Other Plasma components	1	1	BAG family molecular chaperone regulator 3 OS=Homo sapiens GN=BAG3 PE=1 SV=3	0.336238	0.615443	0.200074	0.154935	0.100719	0.323369	0.0674643	0.0299615
P35613	Other Plasma components	1	1	Basigin OS=Homo sapiens GN=BSG PE=1 SV=2	0.366803	0.879463	0.294052	0.344007	0.109874	0.462091	0.0991533	0.0665241
Q9ULI2	Other Plasma components	2	1	Beta-citrylglutamate synthase B OS=Homo sapiens GN=RIMKLB PE=2 SV=2	0.801517	0.480917	1.05451	1.18807	0.240091	0.252686	0.355575	0.22975
Q9H6W3	Other Plasma components	3	3	Bifunctional lysine-specific demethylase and histidyl-hydroxylase NO66 OS=Homo sapiens GN=NO66 PE=1 SV=2	0.0452142	0.565832	0.364849	1.04653	0.0135437	0.297302	0.123026	0.202378
P12830	Other Plasma components	4	3	Cadherin-1 OS=Homo sapiens GN=CDH1 PE=1 SV=3	0.198584	0.318712	0.351077	0.757767	0.0594849	0.167459	0.118382	0.146537
Q00587	Other Plasma components	1	1	Cdc42 effector protein 1 OS=Homo sapiens GN=CDC42EP1 PE=1 SV=1	0.000460618	0.0203792	0.0107999	0.00410679	0.000137976	0.0107077	0.00364168	0.000794172
Q5VT06	Other Plasma components	8	5	Centrosome-associated protein 350 OS=Homo sapiens GN=CEP350 PE=1 SV=1	0.510881	0.507617	0.0608282	0.0641146	0.153032	0.266714	0.020511	0.0123985
Q9BT22	Other Plasma components	1	1	Chitobiosyldiphosphodolichol beta-mannosyltransferase OS=Homo sapiens GN=ALG1 PE=1 SV=2	0.791279	1.7331	2.38781	4.82677	0.237024	0.910615	0.80516	0.933401
O00299	Other Plasma components	4	3	Chloride intracellular channel protein 1 OS=Homo sapiens GN=CLIC1 PE=1 SV=4	0.0476478	0.0837968	0.0855232	0.061345	0.0142727	0.0440289	0.0288381	0.0118629
P02462	Other Plasma components	1	1	Collagen alpha-1(IV) chain OS=Homo sapiens GN=COL4A1 PE=1 SV=3	1.9084	0.273281	0.628107	0.7341	0.571654	0.143588	0.211795	0.14196
P39060	Other Plasma components	8	8	Collagen alpha-1(XVIII) chain OS=Homo sapiens GN=COL18A1 PE=1 SV=5	0.486716	0.426006	0.186282	0.0719405	0.145794	0.223834	0.0628134	0.0139119
Q5KU26	Other Plasma components	2	2	Collectin-12 OS=Homo sapiens GN=COLEC12 PE=1 SV=3	0.185263	0.207217	2.85577	0.836303	0.0554948	0.108877	0.962955	0.161725
Q7Z7K0	Other Plasma components	1	1	COX assembly mitochondrial protein homolog OS=Homo sapiens GN=CMC1 PE=1 SV=1	0.355693	0.241586	0.666641	0.262993	0.106546	0.126935	0.224789	0.0508577
Q86T13	Other Plasma components	3	2	C-type lectin domain family 14 member A OS=Homo sapiens GN=CLEC14A PE=1 SV=1	0.0421152	0.0275592	0.0156877	0.00748794	0.0126154	0.0144803	0.00528984	0.00144802
P01034	Other Plasma components	1	1	Cystatin-C OS=Homo sapiens GN=CST3 PE=1 SV=1	0.383525	0.0498162	0.0319816	0.0214502	0.114883	0.0261746	0.0107841	0.00414804
Q14159	Other Plasma components	3	2	DNA repair-scaffolding protein OS=Homo sapiens GN=SPIDR PE=1 SV=2	0.189686	0.0537956	0.146875	0.173689	0.0568197	0.0282655	0.0495258	0.0335879
Q9UNH5	Other Plasma components	3	3	Dual specificity protein phosphatase CDC14A OS=Homo sapiens GN=CDC14A PE=1 SV=1	0.0582577	0.00336125	0.00310921	0.000999525	0.0174508	0.00176608	0.00104841	0.000193288
P68104;Q5VTE0	Other Plasma components	1	1	Elongation factor 1-alpha 1 OS=Homo sapiens GN=EEF1A1 PE=1 SV=1	0.107795	0.0114784	0.00221536	0	0.0322896	0.00603101	0.00074701	0
Q9UBC2	Other Plasma components	1	1	Epidermal growth factor receptor substrate 15-like 1 OS=Homo sapiens GN=EPS15L1 PE=1 SV=1	0.205044	0.127401	0.372045	0.862214	0.0614201	0.0669394	0.125452	0.166735
Q96BH3	Other Plasma components	1	1	Epididymal sperm-binding protein 1 OS=Homo sapiens GN=ELSPBP1 PE=1 SV=2	0.419653	0.148645	0.369138	0.319539	0.125705	0.0781019	0.124472	0.0617924
P16452	Other Plasma components	8	4	Erythrocyte membrane protein band 4.2 OS=Homo sapiens GN=EPB42 PE=1 SV=3	0.123617	0.0362532	0.0522561	0.0406071	0.037029	0.0190483	0.0176205	0.00785261
Q9NWU2	Other Plasma components	1	1	Glucose-induced degradation protein 8 homolog OS=Homo sapiens GN=GID8 PE=1 SV=1	0.00716058	0.0257396	0.0878563	0.163662	0.00214492	0.0135242	0.0296248	0.0316491
P04406;O14556	Other Plasma components	8	8	Glyceraldehyde-3-phosphate dehydrogenase OS=Homo sapiens GN=GAPDH PE=1 SV=3	1.33463	0.802585	0.529466	0.393236	0.399781	0.421697	0.178534	0.076044
Q5SZD4	Other Plasma components	2	1	Glycine N-acyltransferase-like protein 3 OS=Homo sapiens GN=GLYATL3 PE=2 SV=3	0.00393302	0.0152678	0.187202	0	0.00117812	0.00802207	0.0631238	0
Q03113	Other Plasma components	2	1	Guanine nucleotide-binding protein subunit alpha-12 OS=Homo sapiens GN=GNA12 PE=1 SV=4	0.217907	0.391726	0.211433	0.0747464	0.0652731	0.205822	0.0712945	0.0144545
P0DMV9;P0DMV8;P34931;P54652	Other Plasma components	4	3	Heat shock 70 kDa protein 1B OS=Homo sapiens GN=HSPA1B PE=1 SV=1	0.507069	0.395559	0.175002	0.589647	0.15189	0.207836	0.0590101	0.114026
P17066	Other Plasma components	2	1	Heat shock 70 kDa protein 6 OS=Homo sapiens GN=HSPA6 PE=1 SV=2	0.300175	0.353591	0.123632	0.490691	0.0899161	0.185786	0.0416883	0.09489
P69905	Other Plasma components	3	3	Hemoglobin subunit alpha OS=Homo sapiens GN=HBA1 PE=1 SV=2	0.613469	0.896479	0.242298	0.518191	0.183762	0.471032	0.0817019	0.100208
P68871;P02100;P69891	Other Plasma components	11	7	Hemoglobin subunit beta OS=Homo sapiens GN=HBB PE=1 SV=2	0.445001	0.578194	0.625294	0.981237	0.133298	0.303797	0.210847	0.189752
P02042	Other Plasma components	8	4	Hemoglobin subunit delta OS=Homo sapiens GN=HBD PE=1 SV=2	0.245364	1.05814	0.414581	0.569844	0.0734976	0.555974	0.139795	0.110197
P02790	Other Plasma components	7	6	Hemopexin OS=Homo sapiens GN=HPX PE=1 SV=2	0.511847	0.532335	0.390008	1.03733	0.153321	0.279702	0.131509	0.200599
Q9H3N8	Other Plasma components	1	1	Histamine H4 receptor OS=Homo sapiens GN=HRH4 PE=1 SV=2	0.0126294	0.492475	0.0234747	0	0.00378307	0.258758	0.00791559	0
P30443;P01893;P04439;P05534;P13746;P16188;P30447;P30455;P30501;P30505;P30508;Q07000;Q29960;Q29963;Q9TNN7	Other Plasma components	2	2	HLA class I histocompatibility antigen, A-1 alpha chain OS=Homo sapiens GN=HLA-A PE=1 SV=1	0.0313659	0.11308	0.0505161	0.0415515	0.00939551	0.0594152	0.0170338	0.00803524
P78367	Other Plasma components	1	1	Homeobox protein Nkx-3.2 OS=Homo sapiens GN=NKX3-2 PE=2 SV=2	0.0427084	0.0245898	0.0677793	0.0354488	0.0127931	0.0129201	0.0228549	0.00685509
P18065	Other Plasma components	4	4	Insulin-like growth factor-binding protein 2 OS=Homo sapiens GN=IGFBP2 PE=1 SV=2	0.319921	0.173214	0.139773	0.297859	0.0958308	0.0910109	0.0471309	0.0576001
P17936	Other Plasma components	9	9	Insulin-like growth factor-binding protein 3 OS=Homo sapiens GN=IGFBP3 PE=1 SV=2	0.854493	0.252122	0.413288	0.372276	0.255959	0.132471	0.139359	0.0719908
P22692	Other Plasma components	4	3	Insulin-like growth factor-binding protein 4 OS=Homo sapiens GN=IGFBP4 PE=1 SV=2	0.273573	0.144327	0.0652046	0.382642	0.0819475	0.0758327	0.0219867	0.0739955
P24593	Other Plasma components	5	5	Insulin-like growth factor-binding protein 5 OS=Homo sapiens GN=IGFBP5 PE=1 SV=1	0.35271	0.244526	0.0981359	0.147276	0.105653	0.12848	0.033091	0.0284802
P24592	Other Plasma components	3	3	Insulin-like growth factor-binding protein 6 OS=Homo sapiens GN=IGFBP6 PE=1 SV=1	0.909781	0.440262	0.163249	0.243794	0.272521	0.231325	0.0550468	0.047145
Q14624	Other Plasma components	42	40	Inter-alpha-trypsin inhibitor heavy chain H4 OS=Homo sapiens GN=ITIH4 PE=1 SV=4	7.67464	3.27275	1.6365	1.8362	2.2989	1.71958	0.55182	0.355085
Q1A5X6	Other Plasma components	2	2	IQ domain-containing protein J OS=Homo sapiens GN=IQCJ PE=2 SV=1	0.315245	1.55024	0.245939	0.882264	0.0944303	0.814535	0.0829297	0.170612
Q14145	Other Plasma components	1	1	Kelch-like ECH-associated protein 1 OS=Homo sapiens GN=KEAP1 PE=1 SV=2	0.333032	1.68451	0.964527	1.90804	0.0997582	0.885084	0.325235	0.368977
Q9NR64	Other Plasma components	2	2	Kelch-like protein 1 OS=Homo sapiens GN=KLHL1 PE=2 SV=1	0.0693327	0.0329045	0.00657111	0.0651227	0.0207683	0.0172888	0.00221575	0.0125935
P07195	Other Plasma components	3	3	L-lactate dehydrogenase B chain OS=Homo sapiens GN=LDHB PE=1 SV=2	1.13729	0.247383	0.156591	0.172747	0.340669	0.129981	0.0528018	0.0334059
P61626	Other Plasma components	10	9	Lysozyme C OS=Homo sapiens GN=LYZ PE=1 SV=1	2.83495	0.670437	0.483285	0.591569	0.849198	0.352264	0.162962	0.114398
P21757	Other Plasma components	3	2	Macrophage scavenger receptor types I and II OS=Homo sapiens GN=MSR1 PE=1 SV=1	0.0433063	0.334561	0.25679	0.529106	0.0129722	0.175787	0.0865887	0.102319
P35625	Other Plasma components	4	4	Metalloproteinase inhibitor 3 OS=Homo sapiens GN=TIMP3 PE=1 SV=2	0.0328949	0.121034	0.120726	0.156756	0.00985353	0.0635942	0.0407084	0.0303136
Q9Y6C9	Other Plasma components	1	1	Mitochondrial carrier homolog 2 OS=Homo sapiens GN=MTCH2 PE=1 SV=1	0.0832859	0.0452307	0.424255	0.553906	0.0249479	0.0237653	0.143057	0.107115
Q9BZM5	Other Plasma components	1	1	NKG2D ligand 2 OS=Homo sapiens GN=ULBP2 PE=1 SV=1	0.0157483	0.0474296	0.79135	0.0726992	0.00471733	0.0249207	0.26684	0.0140586
Q13287	Other Plasma components	2	1	N-myc-interactor OS=Homo sapiens GN=NMI PE=1 SV=2	0.119835	0.115767	0.101483	0.232594	0.0358961	0.0608266	0.0342196	0.0449791
P49321	Other Plasma components	2	2	Nuclear autoantigenic sperm protein OS=Homo sapiens GN=NASP PE=1 SV=2	0.0485319	0.000279866	0.00388486	0.0397571	0.0145375	0.000147048	0.00130996	0.00768824
Q02818	Other Plasma components	1	1	Nucleobindin-1 OS=Homo sapiens GN=NUCB1 PE=1 SV=4	0.298993	0.261679	0.218699	0.432309	0.0895621	0.137492	0.0737445	0.0836
Q9H8H0	Other Plasma components	3	2	Nucleolar protein 11 OS=Homo sapiens GN=NOL11 PE=1 SV=1	0.232007	0.546326	0	0	0.0694965	0.287053	0	0
Q8TAD7	Other Plasma components	1	1	Overexpressed in colon carcinoma 1 protein OS=Homo sapiens GN=OCC1 PE=1 SV=2	0.00961469	0.0736679	0.0495931	0.00350944	0.00288004	0.0387069	0.0167226	0.000678655
Q969R2	Other Plasma components	3	2	Oxysterol-binding protein 2 OS=Homo sapiens GN=OSBP2 PE=1 SV=2	0.176081	0.190459	2.16657	0.03078	0.0527443	0.100072	0.730559	0.00595224
Q8N4E4	Other Plasma components	1	1	Phosducin-like protein 2 OS=Homo sapiens GN=PDCL2 PE=1 SV=2	0.0645539	0.619226	0.911965	2.46522	0.0193368	0.325356	0.307511	0.476724
P16671	Other Plasma components	3	3	Platelet glycoprotein 4 OS=Homo sapiens GN=CD36 PE=1 SV=2	0.0592976	0.0762011	0.00598571	0.0372048	0.0177623	0.0400379	0.00201836	0.00719466
P13224	Other Plasma components	1	1	Platelet glycoprotein Ib beta chain OS=Homo sapiens GN=GP1BB PE=1 SV=1	0.378726	0.362157	0.170088	0.349938	0.113446	0.190286	0.057353	0.0676711
P08567	Other Plasma components	5	4	Pleckstrin OS=Homo sapiens GN=PLEK PE=1 SV=3	0.0548206	0.201886	0.0516832	0.0595337	0.0164213	0.106076	0.0174274	0.0115126
A5A3E0;P0CG38	Other Plasma components	16	2	POTE ankyrin domain family member F OS=Homo sapiens GN=POTEF PE=1 SV=2	0.333593	0.266443	0.0104855	0.0708307	0.0999264	0.139995	0.00353567	0.0136973
Q9UKZ9	Other Plasma components	1	1	Procollagen C-endopeptidase enhancer 2 OS=Homo sapiens GN=PCOLCE2 PE=1 SV=1	0.0179518	0.00798291	0.0258322	0.0323717	0.00537738	0.00419442	0.0087105	0.00626005
Q12884	Other Plasma components	3	2	Prolyl endopeptidase FAP OS=Homo sapiens GN=FAP PE=1 SV=5	0.110062	0.106984	0.456202	0.545789	0.0329685	0.0562119	0.153829	0.105545
P11171	Other Plasma components	2	2	Protein 4.1 OS=Homo sapiens GN=EPB41 PE=1 SV=4	0.287557	0.140179	0.238895	0.418545	0.0861365	0.0736533	0.0805545	0.0809382
P02760	Other Plasma components	7	7	Protein AMBP OS=Homo sapiens GN=AMBP PE=1 SV=1	0.735614	0.385316	0.83847	0.652815	0.22035	0.202454	0.282729	0.126241
Q7Z4H9	Other Plasma components	1	1	Protein FAM220A OS=Homo sapiens GN=FAM220A PE=2 SV=1	0.252768	0.083627	0.67926	1.19194	0.0757154	0.0439396	0.229044	0.230497
E2RYF7	Other Plasma components	2	2	Protein PBMUCL2 OS=Homo sapiens GN=HCG22 PE=2 SV=1	0.14517	0.524303	0.331846	0.328753	0.0434851	0.275481	0.111897	0.0635743
Q9BYX7	Other Plasma components	4	1	Putative beta-actin-like protein 3 OS=Homo sapiens GN=POTEKP PE=5 SV=1	0.211919	0.203152	0.0527013	0.388967	0.0634794	0.106741	0.0177707	0.0752185
Q92928;P59190;P61006;P61026;P62820;Q92930;Q9H0U4	Other Plasma components	3	3	Putative Ras-related protein Rab-1C OS=Homo sapiens GN=RAB1C PE=5 SV=2	0.106408	0.117427	0.0141081	0.0754555	0.0318742	0.0616992	0.0047572	0.0145916
A8MT19	Other Plasma components	2	1	Putative rhophilin-2-like protein RHPN2P1 OS=Homo sapiens GN=RHPN2P1 PE=5 SV=2	0.369034	0.232475	0.700224	1.91275	0.110543	0.122148	0.236113	0.369887
Q3MIT2	Other Plasma components	2	2	Putative tRNA pseudouridine synthase Pus10 OS=Homo sapiens GN=PUS10 PE=1 SV=1	0.0954414	0.0591293	0.181663	0.826224	0.028589	0.031068	0.061256	0.159775
Q5SR53	Other Plasma components	1	1	Putative uncharacterized protein PIK3CD-AS1 OS=Homo sapiens GN=PIK3CD-AS1 PE=2 SV=1	0.0451234	0.390113	0.00363987	0.074884	0.0135165	0.204975	0.00122735	0.0144811
Q8IZ41	Other Plasma components	2	2	Ras and EF-hand domain-containing protein OS=Homo sapiens GN=RASEF PE=1 SV=1	4.37047	3.0959	6.09826	5.89932	1.30916	1.62666	2.05631	1.14081
Q15404	Other Plasma components	1	1	Ras suppressor protein 1 OS=Homo sapiens GN=RSU1 PE=1 SV=3	0.119433	0.0587614	0.151226	0.0266163	0.0357757	0.0308746	0.0509929	0.00514706
P61224;P62834	Other Plasma components	6	1	Ras-related protein Rap-1b OS=Homo sapiens GN=RAP1B PE=1 SV=1	0.205416	0.262012	0.193613	0.241763	0.0615314	0.137668	0.0652856	0.0467521
A6NIZ1	Other Plasma components	6	1	Ras-related protein Rap-1b-like protein OS=Homo sapiens PE=2 SV=1	0.151188	0.126393	0.166452	0.202508	0.0452876	0.0664098	0.056127	0.0391611
Q5VYX0	Other Plasma components	1	1	Renalase OS=Homo sapiens GN=RNLS PE=1 SV=1	1.29649	0.863042	2.687	5.75005	0.388357	0.453463	0.906047	1.11195
Q99969	Other Plasma components	5	5	Retinoic acid receptor responder protein 2 OS=Homo sapiens GN=RARRES2 PE=1 SV=1	2.02077	0.336957	0.0674312	0.114804	0.605313	0.177045	0.0227375	0.0222008
P34096	Other Plasma components	3	3	Ribonuclease 4 OS=Homo sapiens GN=RNASE4 PE=1 SV=3	0.738375	0.538324	0.439407	0.138293	0.221177	0.282849	0.148166	0.0267431
P07998	Other Plasma components	2	2	Ribonuclease pancreatic OS=Homo sapiens GN=RNASE1 PE=1 SV=4	0.412602	0.0224634	0.00238977	0.000651547	0.123593	0.0118028	0.00080582	0.000125996
Q12765	Other Plasma components	2	2	Secernin-1 OS=Homo sapiens GN=SCRN1 PE=1 SV=2	0.383125	0.379584	0.227517	0.928424	0.114764	0.199442	0.0767177	0.179539
P49908	Other Plasma components	5	4	Selenoprotein P OS=Homo sapiens GN=SELENOP PE=1 SV=3	1.01785	0.647682	0.33164	0.74939	0.304893	0.340308	0.111828	0.144917
Q86V86	Other Plasma components	1	1	Serine/threonine-protein kinase pim-3 OS=Homo sapiens GN=PIM3 PE=1 SV=3	0.142479	0.129653	0.558651	0.468282	0.042679	0.068123	0.188375	0.0905565
P02787	Other Plasma components	32	29	Serotransferrin OS=Homo sapiens GN=TF PE=1 SV=3	1.47694	1.16896	1.06805	2.0334	0.442412	0.614201	0.360144	0.393218
P02768	Other Plasma components	63	59	Serum albumin OS=Homo sapiens GN=ALB PE=1 SV=2	36.5541	20.2274	32.1026	86.4891	10.9496	10.628	10.8249	16.7253
P0DJI9	Other Plasma components	5	1	Serum amyloid A-2 protein OS=Homo sapiens GN=SAA2 PE=1 SV=1	0.0510059	0.0366843	0.0957713	0.0187445	0.0152786	0.0192748	0.0322937	0.00362482
Q5TCZ1	Other Plasma components	1	1	SH3 and PX domain-containing protein 2A OS=Homo sapiens GN=SH3PXD2A PE=1 SV=1	0.000400575	0.00133303	0.0830455	0.316556	0.00011999	0.000700404	0.0280026	0.0612157
P11166	Other Plasma components	5	4	Solute carrier family 2, facilitated glucose transporter member 1 OS=Homo sapiens GN=SLC2A1 PE=1 SV=2	0.355523	0.205302	0.255282	0.170899	0.106495	0.10787	0.08608	0.0330486
Q14515	Other Plasma components	3	2	SPARC-like protein 1 OS=Homo sapiens GN=SPARCL1 PE=1 SV=2	3.14836	0.619498	0.387044	0.435447	0.943077	0.3255	0.13051	0.0842068
P02549	Other Plasma components	39	32	Spectrin alpha chain, erythrocytic 1 OS=Homo sapiens GN=SPTA1 PE=1 SV=5	0.459515	0.330964	0.406662	0.394687	0.137646	0.173896	0.137125	0.0763246
Q6IMI6	Other Plasma components	1	1	Sulfotransferase 1C3 OS=Homo sapiens GN=SULT1C3 PE=1 SV=1	0.0145145	0.00381204	0.239079	0.0666414	0.00434776	0.00200294	0.0806165	0.0128871
Q12824	Other Plasma components	1	1	SWI/SNF-related matrix-associated actin-dependent regulator of chromatin subfamily B member 1 OS=Homo sapiens GN=SMARCB1 PE=1 SV=2	0.151265	0.132304	1.56368	0.274218	0.0453107	0.0695158	0.527266	0.0530283
Q92777	Other Plasma components	2	2	Synapsin-2 OS=Homo sapiens GN=SYN2 PE=2 SV=3	0.315253	0.283888	0.284213	0.495842	0.0944326	0.149162	0.0958356	0.095886
B1AL88	Other Plasma components	2	2	Transmembrane protein FAM155A OS=Homo sapiens GN=FAM155A PE=2 SV=1	0.0514756	0.0583648	0.112275	0.0699503	0.0154193	0.0306663	0.0378588	0.013527
P02766	Other Plasma components	4	3	Transthyretin OS=Homo sapiens GN=TTR PE=1 SV=1	0.234497	0.218122	0.28371	0.466999	0.0702425	0.114607	0.0956658	0.0903084
Q96DX7	Other Plasma components	2	2	Tripartite motif-containing protein 44 OS=Homo sapiens GN=TRIM44 PE=1 SV=1	0.000681139	0.0967474	0.00468023	0.0077897	0.000204032	0.0508334	0.00157815	0.00150637
P68366;Q9NY65	Other Plasma components	7	4	Tubulin alpha-4A chain OS=Homo sapiens GN=TUBA4A PE=1 SV=1	1.08057	0.290343	0.13711	0.0584413	0.323681	0.152553	0.046233	0.0113014
Q9H4B7	Other Plasma components	6	5	Tubulin beta-1 chain OS=Homo sapiens GN=TUBB1 PE=1 SV=1	0.0775254	0.196759	0.170737	0.143171	0.0232224	0.103382	0.057572	0.0276864
Q06124	Other Plasma components	2	2	Tyrosine-protein phosphatase non-receptor type 11 OS=Homo sapiens GN=PTPN11 PE=1 SV=2	0.00129665	0.00298538	0.00111219	0	0.000388406	0.00156859	0.000375025	0
Q9NZ43	Other Plasma components	1	1	Vesicle transport protein USE1 OS=Homo sapiens GN=USE1 PE=1 SV=2	0.0250579	0.0122631	0.0119672	0.0263677	0.00750597	0.00644334	0.00403528	0.00509899
P02774	Other Plasma components	5	4	Vitamin D-binding protein OS=Homo sapiens GN=GC PE=1 SV=1	0.191735	0.152416	0.0393753	0.151893	0.0574334	0.0800832	0.0132772	0.029373
O75083	Other Plasma components	4	4	WD repeat-containing protein 1 OS=Homo sapiens GN=WDR1 PE=1 SV=4	0.0375726	0.137677	0.511388	0.0252852	0.0112547	0.0723388	0.172438	0.00488965
Q8NA23	Other Plasma components	2	2	WD repeat-containing protein 31 OS=Homo sapiens GN=WDR31 PE=2 SV=1	0.0267993	0.0523653	0.0612581	0.1811	0.00802761	0.027514	0.020656	0.0350212
Q702N8	Other Plasma components	3	2	Xin actin-binding repeat-containing protein 1 OS=Homo sapiens GN=XIRP1 PE=1 SV=1	0.0921523	0.253448	0.0858571	0.667495	0.0276038	0.133168	0.0289507	0.12908
Q96ME7	Other Plasma components	1	1	Zinc finger protein 512 OS=Homo sapiens GN=ZNF512 PE=1 SV=2	0.123191	0	0	0	0.0369014	0	0	0
Q01954	Other Plasma components	1	1	Zinc finger protein basonuclin-1 OS=Homo sapiens GN=BNC1 PE=1 SV=2	0.73137	0.530124	5.59185	15.6372	0.219079	0.27854	1.88555	3.02393
P62258	Tissue Leakage	3	1	14-3-3 protein epsilon OS=Homo sapiens GN=YWHAE PE=1 SV=1	0.0161371	0.0133979	0.000202971	0.00120379	0.0048338	0.00703956	6.84409e-05	0.00023279
P62736;P63267;P68032;P68133	Tissue Leakage	16	4	Actin, aortic smooth muscle OS=Homo sapiens GN=ACTA2 PE=1 SV=1	0.349511	0.694692	0.459589	1.01299	0.104694	0.365008	0.154972	0.195893
P60709;P63261	Tissue Leakage	26	10	Actin, cytoplasmic 1 OS=Homo sapiens GN=ACTB PE=1 SV=1	4.74684	2.31973	1.37713	3.73318	1.4219	1.21884	0.464362	0.721923
Q01518	Tissue Leakage	4	3	Adenylyl cyclase-associated protein 1 OS=Homo sapiens GN=CAP1 PE=1 SV=5	0.00748635	0.0398883	0.0161368	0.0140408	0.0022425	0.0209583	0.00544126	0.00271522
O43707	Tissue Leakage	15	4	Alpha-actinin-4 OS=Homo sapiens GN=ACTN4 PE=1 SV=2	0.0791313	0.090197	0.242442	0.169723	0.0237034	0.0473917	0.0817504	0.0328211
P03950	Tissue Leakage	6	5	Angiogenin OS=Homo sapiens GN=ANG PE=1 SV=1	2.13271	1.19934	1.15333	1.30844	0.638845	0.630163	0.388897	0.253026
O15392	Tissue Leakage	2	2	Baculoviral IAP repeat-containing protein 5 OS=Homo sapiens GN=BIRC5 PE=1 SV=3	0.0685246	0.125027	0.025695	0.169947	0.0205262	0.0656925	0.00866427	0.0328645
Q562R1	Tissue Leakage	10	4	Beta-actin-like protein 2 OS=Homo sapiens GN=ACTBL2 PE=1 SV=2	0.433232	0.258661	0.146398	0.868649	0.129773	0.135907	0.0493649	0.16798
P15169	Tissue Leakage	8	7	Carboxypeptidase N catalytic chain OS=Homo sapiens GN=CPN1 PE=1 SV=1	0.570607	0.345425	0.205634	0.632252	0.170923	0.181495	0.0693389	0.122265
P49913	Tissue Leakage	3	2	Cathelicidin antimicrobial peptide OS=Homo sapiens GN=CAMP PE=1 SV=1	0.212545	0.0583461	0.0828953	0.0415652	0.0636669	0.0306564	0.027952	0.00803789
O43866	Tissue Leakage	4	3	CD5 antigen-like OS=Homo sapiens GN=CD5L PE=1 SV=1	0.112911	0.0930279	0.24829	0.475043	0.0338219	0.0488791	0.0837224	0.0918638
P23528;Q9Y281	Tissue Leakage	6	5	Cofilin-1 OS=Homo sapiens GN=CFL1 PE=1 SV=3	0.446279	0.400014	0.0554574	0.330706	0.133681	0.210177	0.0187	0.063952
P27105	Tissue Leakage	7	6	Erythrocyte band 7 integral membrane protein OS=Homo sapiens GN=STOM PE=1 SV=3	0.345225	0.338465	0.291613	0.189966	0.103411	0.177838	0.0983308	0.0367357
Q86UX7	Tissue Leakage	15	13	Fermitin family homolog 3 OS=Homo sapiens GN=FERMT3 PE=1 SV=1	0.127685	0.339365	0.126574	0.312136	0.0382473	0.178311	0.0426803	0.0603609
P21333	Tissue Leakage	61	55	Filamin-A OS=Homo sapiens GN=FLNA PE=1 SV=4	1.0321	0.770732	0.310375	0.38557	0.30916	0.404961	0.104657	0.0745617
P30043	Tissue Leakage	4	4	Flavin reductase (NADPH) OS=Homo sapiens GN=BLVRB PE=1 SV=3	0.208712	0.0256149	0.00360158	0.0250587	0.0625187	0.0134587	0.00121444	0.00484586
P04075	Tissue Leakage	4	3	Fructose-bisphosphate aldolase A OS=Homo sapiens GN=ALDOA PE=1 SV=2	0.150404	0.0769613	0.0128954	0.0731726	0.0450529	0.0404373	0.00434828	0.0141501
P06396	Tissue Leakage	25	22	Gelsolin OS=Homo sapiens GN=GSN PE=1 SV=1	2.31613	1.48685	3.93088	7.00124	0.693786	0.781227	1.32548	1.3539
P11142	Tissue Leakage	4	3	Heat shock cognate 71 kDa protein OS=Homo sapiens GN=HSPA8 PE=1 SV=1	0.0785504	0.144618	0.25502	0.567793	0.0235294	0.0759859	0.0859918	0.1098
Q04756	Tissue Leakage	8	7	Hepatocyte growth factor activator OS=Homo sapiens GN=HGFAC PE=1 SV=1	0.568865	0.24881	0.130823	0.126138	0.170401	0.130731	0.0441129	0.0243926
Q14532	Tissue Leakage	4	1	Keratin, type I cuticular Ha2 OS=Homo sapiens GN=KRT32 PE=2 SV=3	0.139334	0.00522202	0	0	0.0417369	0.00274378	0	0
Q92764	Tissue Leakage	4	1	Keratin, type I cuticular Ha5 OS=Homo sapiens GN=KRT35 PE=2 SV=5	1.56347	0.627739	0.153617	0.172738	0.468331	0.329829	0.051799	0.0334041
O76015;O76014	Tissue Leakage	4	3	Keratin, type I cuticular Ha8 OS=Homo sapiens GN=KRT38 PE=1 SV=3	0.030505	0.0396444	0.0353056	0.0354024	0.00913765	0.0208302	0.0119049	0.00684613
P13645;Q14525;Q7Z3Y7;Q7Z3Y8;Q7Z3Y9	Tissue Leakage	36	29	Keratin, type I cytoskeletal 10 OS=Homo sapiens GN=KRT10 PE=1 SV=6	0.937472	0.881008	2.24574	3.89062	0.280816	0.462903	0.757255	0.75237
P13646	Tissue Leakage	11	4	Keratin, type I cytoskeletal 13 OS=Homo sapiens GN=KRT13 PE=1 SV=4	0.842054	0.381123	0.203126	0.606033	0.252233	0.200251	0.0684934	0.117195
P02533	Tissue Leakage	28	8	Keratin, type I cytoskeletal 14 OS=Homo sapiens GN=KRT14 PE=1 SV=4	0.353725	0.245082	0.790321	1.38909	0.105957	0.128772	0.266493	0.268622
P19012	Tissue Leakage	13	5	Keratin, type I cytoskeletal 15 OS=Homo sapiens GN=KRT15 PE=1 SV=3	2.02459	1.03309	0.619174	1.64145	0.606456	0.542809	0.208783	0.317424
P08779	Tissue Leakage	26	8	Keratin, type I cytoskeletal 16 OS=Homo sapiens GN=KRT16 PE=1 SV=4	0.445936	0.378874	0.891408	0.803572	0.133578	0.19907	0.300579	0.155395
Q04695	Tissue Leakage	18	7	Keratin, type I cytoskeletal 17 OS=Homo sapiens GN=KRT17 PE=1 SV=2	2.72055	0.484047	1.55883	0.59368	0.814929	0.25433	0.525633	0.114806
P05783	Tissue Leakage	4	3	Keratin, type I cytoskeletal 18 OS=Homo sapiens GN=KRT18 PE=1 SV=2	0.40122	0.239394	0.781244	1.7562	0.120184	0.125783	0.263433	0.339615
Q2M2I5	Tissue Leakage	5	2	Keratin, type I cytoskeletal 24 OS=Homo sapiens GN=KRT24 PE=1 SV=1	0.0126521	0.0360747	0.0424269	0.0493071	0.00378987	0.0189545	0.0143062	0.00953501
Q7Z3Z0	Tissue Leakage	3	1	Keratin, type I cytoskeletal 25 OS=Homo sapiens GN=KRT25 PE=1 SV=1	0.00289919	0.00339269	0.00987623	0.00686104	0.000868441	0.0017826	0.00333023	0.00132679
P35527	Tissue Leakage	34	29	Keratin, type I cytoskeletal 9 OS=Homo sapiens GN=KRT9 PE=1 SV=3	1.41187	1.01139	3.36405	3.44242	0.422919	0.531411	1.13434	0.665695
Q9NSB2	Tissue Leakage	6	4	Keratin, type II cuticular Hb4 OS=Homo sapiens GN=KRT84 PE=2 SV=2	0.0855709	0.216694	0.229726	0.255218	0.0256324	0.113856	0.0774626	0.0493541
P04264	Tissue Leakage	35	29	Keratin, type II cytoskeletal 1 OS=Homo sapiens GN=KRT1 PE=1 SV=6	2.07695	2.53836	7.38728	7.90591	0.622141	1.33371	2.49096	1.52885
Q7Z794	Tissue Leakage	10	5	Keratin, type II cytoskeletal 1b OS=Homo sapiens GN=KRT77 PE=2 SV=3	0.173275	0.175752	0.28285	0.477924	0.0519038	0.0923444	0.0953759	0.092421
P35908;P12036;Q5XKE5;Q8N1N4	Tissue Leakage	28	18	Keratin, type II cytoskeletal 2 epidermal OS=Homo sapiens GN=KRT2 PE=1 SV=2	0.865831	1.17909	1.68552	1.5337	0.259356	0.619521	0.56835	0.296587
Q01546	Tissue Leakage	8	1	Keratin, type II cytoskeletal 2 oral OS=Homo sapiens GN=KRT76 PE=1 SV=2	0.152684	0.233173	0.0604838	0.0262139	0.045736	0.122515	0.0203949	0.00506926
P19013	Tissue Leakage	6	3	Keratin, type II cytoskeletal 4 OS=Homo sapiens GN=KRT4 PE=1 SV=4	0.240654	0.0505147	0.0163019	0.0113433	0.0720868	0.0265416	0.00549692	0.00219358
P13647	Tissue Leakage	19	8	Keratin, type II cytoskeletal 5 OS=Homo sapiens GN=KRT5 PE=1 SV=3	0.372711	0.432773	0.665325	0.659668	0.111644	0.22739	0.224345	0.127567
P02538	Tissue Leakage	26	3	Keratin, type II cytoskeletal 6A OS=Homo sapiens GN=KRT6A PE=1 SV=3	0.715094	0.236953	0.174173	0.180758	0.214203	0.124501	0.0587305	0.0349551
P04259	Tissue Leakage	23	2	Keratin, type II cytoskeletal 6B OS=Homo sapiens GN=KRT6B PE=1 SV=5	0.217628	0.0952801	0.192579	0.249045	0.0651896	0.0500625	0.0649369	0.0481604
P08729	Tissue Leakage	4	2	Keratin, type II cytoskeletal 7 OS=Homo sapiens GN=KRT7 PE=1 SV=5	1.18936	0.423568	0.374035	1.62606	0.356269	0.222553	0.126123	0.314447
Q86Y46;Q3SY84	Tissue Leakage	9	4	Keratin, type II cytoskeletal 73 OS=Homo sapiens GN=KRT73 PE=1 SV=1	0.237516	0.130215	0.198927	0.40838	0.0711467	0.0684183	0.0670774	0.0789727
Q7RTS7	Tissue Leakage	5	2	Keratin, type II cytoskeletal 74 OS=Homo sapiens GN=KRT74 PE=1 SV=2	0.417149	0.260302	0.456717	0.979453	0.124955	0.136769	0.154003	0.189407
O95678	Tissue Leakage	10	2	Keratin, type II cytoskeletal 75 OS=Homo sapiens GN=KRT75 PE=1 SV=2	0.732157	0.461111	0.139619	0.150689	0.219314	0.242279	0.0470788	0.0291403
P05787	Tissue Leakage	3	1	Keratin, type II cytoskeletal 8 OS=Homo sapiens GN=KRT8 PE=1 SV=7	0.620007	0.400609	2.2619	4.88793	0.18572	0.210489	0.762705	0.94523
P02788	Tissue Leakage	10	10	Lactotransferrin OS=Homo sapiens GN=LTF PE=1 SV=6	0.439277	0.313376	0.263886	0.554462	0.131584	0.164655	0.0889813	0.107222
Q14766	Tissue Leakage	3	3	Latent-transforming growth factor beta-binding protein 1 OS=Homo sapiens GN=LTBP1 PE=1 SV=4	0.0995175	0.099795	0.0310884	0.00173398	0.02981	0.0524347	0.0104829	0.000335318
O14960	Tissue Leakage	2	2	Leukocyte cell-derived chemotaxin-2 OS=Homo sapiens GN=LECT2 PE=1 SV=2	0.588337	0.468962	0.630703	1.02282	0.176234	0.246404	0.212671	0.197793
P35579	Tissue Leakage	17	15	Myosin-9 OS=Homo sapiens GN=MYH9 PE=1 SV=4	2.68283	0.823419	0.482218	0.371034	0.803629	0.432644	0.162602	0.0717507
P0CG39	Tissue Leakage	10	1	POTE ankyrin domain family member J OS=Homo sapiens GN=POTEJ PE=3 SV=1	0.000165724	0.00211311	0.00108558	0.0117696	4.96418e-05	0.00111028	0.000366052	0.00227601
Q15113	Tissue Leakage	13	11	Procollagen C-endopeptidase enhancer 1 OS=Homo sapiens GN=PCOLCE PE=1 SV=2	2.03579	0.582095	1.51848	1.95686	0.609812	0.305847	0.512024	0.378418
P07737	Tissue Leakage	5	5	Profilin-1 OS=Homo sapiens GN=PFN1 PE=1 SV=2	0.298935	0.565868	0.304508	0.576457	0.0895447	0.297321	0.102679	0.111475
Q92954	Tissue Leakage	17	15	Proteoglycan 4 OS=Homo sapiens GN=PRG4 PE=1 SV=2	0.852514	0.56262	0.60106	0.459444	0.255367	0.295614	0.202675	0.0888474
P14618	Tissue Leakage	6	5	Pyruvate kinase PKM OS=Homo sapiens GN=PKM PE=1 SV=4	0.225825	0.883755	1.84072	3.63806	0.0676449	0.464346	0.620685	0.703529
Q9H2S5	Tissue Leakage	2	2	RING finger protein 39 OS=Homo sapiens GN=RNF39 PE=2 SV=2	0.00134474	0.0400042	0	0.00617732	0.00040281	0.0210192	0	0.00119457
P11277	Tissue Leakage	35	32	Spectrin beta chain, erythrocytic OS=Homo sapiens GN=SPTB PE=1 SV=5	1.67136	0.894967	1.09419	3.2923	0.500648	0.470237	0.368956	0.636666
Q9Y490	Tissue Leakage	68	64	Talin-1 OS=Homo sapiens GN=TLN1 PE=1 SV=3	1.75425	1.13086	2.35045	2.79955	0.525479	0.594181	0.792564	0.541378
P10646	Tissue Leakage	2	1	Tissue factor pathway inhibitor OS=Homo sapiens GN=TFPI PE=1 SV=1	0.257676	0.198194	0.194037	0.652108	0.0771857	0.104136	0.0654285	0.126105
P67936	Tissue Leakage	2	2	Tropomyosin alpha-4 chain OS=Homo sapiens GN=TPM4 PE=1 SV=3	0.0489719	0.0471689	0.00675357	0.00353743	0.0146693	0.0247837	0.00227728	0.000684069
P18206	Tissue Leakage	18	15	Vinculin OS=Homo sapiens GN=VCL PE=1 SV=4	0.413211	0.958614	1.09671	0.384909	0.123775	0.503679	0.369806	0.0744338
P04004	Tissue Leakage	17	17	Vitronectin OS=Homo sapiens GN=VTN PE=1 SV=1	17.3144	5.80928	1.46659	4.00074	5.18646	3.05234	0.494529	0.773663

## Sheet: OVA
					Amount in fmol				Amount in %						Amount in %
					OVA-TAD		OVA-TDI		OVA-TAD		OVA-TDI				OVA-TAD		OVA-TDI
Accession	Annotation	Peptide count	Unique peptides	Description	Plasma	Serum	Plasma	Serum	Plasma	Serum	Plasma	Serum			Plasma	Serum	Plasma	Serum
P02763;P19652	Acute Phase	5	5	Alpha-1-acid glycoprotein 1 OS=Homo sapiens GN=ORM1 PE=1 SV=1	0.997231	0.561789	0.641247	0.564653	0.135851	0.115758	0.118849	0.101786		Acute Phase	2.38285	2.98047	2.28044	2.61812
P01009	Acute Phase	7	5	Alpha-1-antitrypsin OS=Homo sapiens GN=SERPINA1 PE=1 SV=3	2.20121	2.18798	2.70874	1.83269	0.299868	0.450838	0.502038	0.330365		Coagulation	23.5565	12.5741	6.3943	11.0875
P01023	Acute Phase	25	24	Alpha-2-macroglobulin OS=Homo sapiens GN=A2M PE=1 SV=3	1.8138	1.26582	2.23171	1.24225	0.247092	0.260826	0.413625	0.223931		Complement system	10.4907	14.4695	12.5766	13.7693
P00450	Acute Phase	7	6	Ceruloplasmin OS=Homo sapiens GN=CP PE=1 SV=1	1.13736	0.059161	0.0749114	0.109715	0.154941	0.0121903	0.0138841	0.0197775		Immunoglobulins	9.4889	7.72342	14.3801	19.1751
P02751	Acute Phase	22	21	Fibronectin OS=Homo sapiens GN=FN1 PE=1 SV=4	1.07798	0.313946	0.5063	0.57489	0.146852	0.0646893	0.0938378	0.103631		Lipoproteins	8.10733	8.98386	13.7135	8.57187
P00738	Acute Phase	14	7	Haptoglobin OS=Homo sapiens GN=HP PE=1 SV=1	2.19183	2.02964	1.6694	3.79344	0.29859	0.418212	0.309406	0.683814		Serum albumin	7.7607	9.23125	10.2822	6.17026
P00739	Acute Phase	12	3	Haptoglobin-related protein OS=Homo sapiens GN=HPR PE=2 SV=2	2.46021	1.31742	1.87004	2.01742	0.335151	0.271457	0.346593	0.363665		Other proteins	19.0501	24.0254	20.1944	18.1411
Q13418	Acute Phase	7	7	Integrin-linked protein kinase OS=Homo sapiens GN=ILK PE=1 SV=2	0.396943	0.454269	0.35734	0.370367	0.054075	0.0936032	0.0662295	0.0667631		Tissue Leakage	19.163	20.012	20.1784	20.4668
P18428	Acute Phase	7	7	Lipopolysaccharide-binding protein OS=Homo sapiens GN=LBP PE=1 SV=3	1.59664	1.45591	0.899459	1.5366	0.217508	0.299994	0.166706	0.27699
P02775	Acute Phase	5	5	Platelet basic protein OS=Homo sapiens GN=PPBP PE=1 SV=3	3.38376	4.74178	1.2796	2.32562	0.460966	0.977054	0.237161	0.419222			100	100	100	100
P06753	Acute Phase	2	1	Tropomyosin alpha-3 chain OS=Homo sapiens GN=TPM3 PE=1 SV=2	0.234598	0.0769334	0.0653438	0.156298	0.031959	0.0158523	0.0121108	0.0281747
P01008	Coagulation	26	24	Antithrombin-III OS=Homo sapiens GN=SERPINC1 PE=1 SV=1	4.52332	6.48271	1.18155	11.631	0.616206	1.33578	0.218988	2.09663
Q9HBI1	Coagulation	4	4	Beta-parvin OS=Homo sapiens GN=PARVB PE=1 SV=1	0.595999	0.664322	0.648354	0.706631	0.0811922	0.136885	0.120166	0.127379
P12259	Coagulation	49	43	Coagulation factor V OS=Homo sapiens GN=F5 PE=1 SV=4	3.97688	13.7769	5.90457	15.9959	0.541765	2.83876	1.09435	2.88346
P03951	Coagulation	31	30	Coagulation factor XI OS=Homo sapiens GN=F11 PE=1 SV=1	27.3252	8.1405	0.511472	0.929393	3.72247	1.67737	0.0947964	0.167534
P02671	Coagulation	28	25	Fibrinogen alpha chain OS=Homo sapiens GN=FGA PE=1 SV=2	41.2761	2.13011	2.57523	1.26022	5.62299	0.438915	0.477294	0.22717
P02675	Coagulation	26	23	Fibrinogen beta chain OS=Homo sapiens GN=FGB PE=1 SV=2	9.39369	2.40157	4.77899	1.70016	1.27969	0.494849	0.885739	0.306474
P02679	Coagulation	23	22	Fibrinogen gamma chain OS=Homo sapiens GN=FGG PE=1 SV=3	14.269	0.531277	2.9313	0.582233	1.94384	0.109471	0.543288	0.104955
P04196	Coagulation	15	13	Histidine-rich glycoprotein OS=Homo sapiens GN=HRG PE=1 SV=1	4.52234	1.66684	1.56136	2.49141	0.616073	0.343456	0.289383	0.449108
P08514	Coagulation	27	25	Integrin alpha-IIb OS=Homo sapiens GN=ITGA2B PE=1 SV=3	2.33	2.56266	3.48816	2.55447	0.317413	0.528042	0.646497	0.460474
P01042	Coagulation	17	17	Kininogen-1 OS=Homo sapiens GN=KNG1 PE=1 SV=2	29.319	5.80557	0.719508	1.28209	3.99409	1.19625	0.133354	0.231112
Q13201	Coagulation	15	10	Multimerin-1 OS=Homo sapiens GN=MMRN1 PE=1 SV=3	2.11815	0.924827	0.773202	0.764807	0.288552	0.190563	0.143306	0.137866
P03952	Coagulation	11	11	Plasma kallikrein OS=Homo sapiens GN=KLKB1 PE=1 SV=1	1.11467	0.669917	0.49849	0.366994	0.15185	0.138038	0.0923903	0.0661552
P05154	Coagulation	15	14	Plasma serine protease inhibitor OS=Homo sapiens GN=SERPINA5 PE=1 SV=3	8.76694	1.35162	1.8234	1.55291	1.19431	0.278505	0.33795	0.279931
P02776;P10720	Coagulation	4	4	Platelet factor 4 OS=Homo sapiens GN=PF4 PE=1 SV=2	17.9332	5.81094	2.55881	4.0765	2.44302	1.19736	0.47425	0.734839
A5A3E0;Q9BYX7	Coagulation	18	2	POTE ankyrin domain family member F OS=Homo sapiens GN=POTEF PE=1 SV=2	0.27934	0.127582	0.0727013	0.217889	0.0380542	0.0262886	0.0134745	0.0392771
P00734	Coagulation	26	22	Prothrombin OS=Homo sapiens GN=F2 PE=1 SV=2	1.94198	4.55665	2.41406	11.9798	0.264553	0.938907	0.447423	2.1595
Q6ZSB3	Coagulation	2	2	Putative uncharacterized protein encoded by LINC00299 OS=Homo sapiens GN=LINC00299 PE=5 SV=1	0.731251	0.447391	0.194663	1.19334	0.0996174	0.0921859	0.0360789	0.215115
P61224;A6NIZ1;P62834	Coagulation	6	6	Ras-related protein Rap-1b OS=Homo sapiens GN=RAP1B PE=1 SV=1	0.810101	2.30574	0.617059	1.41191	0.110359	0.475103	0.114366	0.254515
P27169	Coagulation	3	3	Serum paraoxonase/arylesterase 1 OS=Homo sapiens GN=PON1 PE=1 SV=3	0.739182	0.130036	0.458999	0.221872	0.100698	0.0267941	0.085071	0.0399952
P02549	Coagulation	26	23	Spectrin alpha chain, erythrocytic 1 OS=Homo sapiens GN=SPTA1 PE=1 SV=5	0.952273	0.536703	0.788443	0.588032	0.129727	0.110589	0.14613	0.106
Q99856	Complement system	2	2	AT-rich interactive domain-containing protein 3A OS=Homo sapiens GN=ARID3A PE=1 SV=2	0.423436	0.453616	0.700902	0.730546	0.0576842	0.0934686	0.129905	0.13169
P02730	Complement system	20	20	Band 3 anion transport protein OS=Homo sapiens GN=SLC4A1 PE=1 SV=3	5.46238	2.34271	3.41889	1.55742	0.744133	0.482721	0.633657	0.280744
Q562R1	Complement system	17	7	Beta-actin-like protein 2 OS=Homo sapiens GN=ACTBL2 PE=1 SV=2	0.836144	0.662184	0.557138	0.645581	0.113907	0.136444	0.10326	0.116374
P04003	Complement system	18	15	C4b-binding protein alpha chain OS=Homo sapiens GN=C4BPA PE=1 SV=2	8.15444	3.05719	7.70447	4.72024	1.11087	0.62994	1.42795	0.850881
P00488	Complement system	12	9	Coagulation factor XIII A chain OS=Homo sapiens GN=F13A1 PE=1 SV=4	0.818764	1.42826	0.603909	1.26533	0.111539	0.294295	0.111929	0.22809
P23528;Q9Y281	Complement system	6	5	Cofilin-1 OS=Homo sapiens GN=CFL1 PE=1 SV=3	0.675785	1.85058	0.31497	1.31619	0.0920614	0.381317	0.0583766	0.237259
P02745	Complement system	6	6	Complement C1q subcomponent subunit A OS=Homo sapiens GN=C1QA PE=1 SV=2	0.433073	0.237554	2.88055	0.695225	0.0589969	0.0489486	0.533882	0.125323
Q9BXJ3	Complement system	1	1	Complement C1q tumor necrosis factor-related protein 4 OS=Homo sapiens GN=C1QTNF4 PE=1 SV=2	5.23913	2.28812	0.947761	1.5439	0.713719	0.471472	0.175658	0.278306
P01024	Complement system	113	108	Complement C3 OS=Homo sapiens GN=C3 PE=1 SV=2	8.41119	14.9292	10.4608	18.9481	1.14585	3.0762	1.9388	3.41562
P0C0L4	Complement system	56	3	Complement C4-A OS=Homo sapiens GN=C4A PE=1 SV=2	3.90967	2.82231	3.80934	2.79763	0.532609	0.581542	0.706023	0.504306
P0C0L5	Complement system	57	4	Complement C4-B OS=Homo sapiens GN=C4B PE=1 SV=2	2.86405	2.0675	2.79055	2.04942	0.390166	0.426012	0.517202	0.369433
P01031	Complement system	45	42	Complement C5 OS=Homo sapiens GN=C5 PE=1 SV=4	1.75759	2.38156	1.67288	2.64008	0.239434	0.490725	0.310052	0.475906
P13671	Complement system	27	25	Complement component C6 OS=Homo sapiens GN=C6 PE=1 SV=3	1.85051	1.20297	1.04342	1.50572	0.252092	0.247874	0.193387	0.271425
P10643	Complement system	19	19	Complement component C7 OS=Homo sapiens GN=C7 PE=1 SV=2	2.08224	2.87579	2.71977	2.98667	0.283661	0.592564	0.504083	0.538384
P07357	Complement system	10	10	Complement component C8 alpha chain OS=Homo sapiens GN=C8A PE=1 SV=2	1.43604	2.05673	2.01249	2.2891	0.19563	0.423794	0.372996	0.412638
P07360	Complement system	7	7	Complement component C8 gamma chain OS=Homo sapiens GN=C8G PE=1 SV=3	1.59829	1.66105	0.551709	1.68796	0.217733	0.342262	0.102254	0.304275
P02748	Complement system	25	24	Complement component C9 OS=Homo sapiens GN=C9 PE=1 SV=2	2.73383	6.41066	5.16355	6.49392	0.372426	1.32093	0.957014	1.17061
P00751	Complement system	5	4	Complement factor B OS=Homo sapiens GN=CFB PE=1 SV=2	0.93932	0.890704	1.44363	0.853491	0.127962	0.183531	0.267564	0.153852
P08603	Complement system	44	34	Complement factor H OS=Homo sapiens GN=CFH PE=1 SV=4	3.66867	1.75007	2.65096	2.46546	0.499778	0.360606	0.491331	0.444428
Q03591	Complement system	14	3	Complement factor H-related protein 1 OS=Homo sapiens GN=CFHR1 PE=1 SV=2	11.4966	3.11238	5.0903	2.61603	1.56617	0.641313	0.943438	0.471571
P36980	Complement system	7	2	Complement factor H-related protein 2 OS=Homo sapiens GN=CFHR2 PE=1 SV=1	4.69073	1.85233	2.63478	4.17724	0.639013	0.381677	0.488331	0.752998
Q9BXR6	Complement system	22	18	Complement factor H-related protein 5 OS=Homo sapiens GN=CFHR5 PE=1 SV=1	2.24975	2.67579	3.67049	3.36663	0.30648	0.551353	0.680289	0.606877
O00602	Complement system	9	8	Ficolin-1 OS=Homo sapiens GN=FCN1 PE=1 SV=2	1.56075	2.46208	0.849806	0.388272	0.212619	0.507316	0.157503	0.0699907
P27918	Complement system	9	6	Properdin OS=Homo sapiens GN=CFP PE=1 SV=2	2.54571	5.80881	3.01561	6.75948	0.346799	1.19692	0.558914	1.21848
P15153	Complement system	4	3	Ras-related C3 botulinum toxin substrate 2 OS=Homo sapiens GN=RAC2 PE=1 SV=1	0.932648	2.70106	1.13681	1.84891	0.127053	0.556559	0.210698	0.333288
P0DJI8;P0DJI9	Complement system	2	2	Serum amyloid A-1 protein OS=Homo sapiens GN=SAA1 PE=1 SV=1	0.236951	0.241369	0.0112782	0.0361961	0.0322796	0.0497346	0.00209031	0.00652478
P01876;P01877	Immunoglobulins	14	12	Ig alpha-1 chain C region OS=Homo sapiens GN=IGHA1 PE=1 SV=2	4.03551	1.76393	5.54758	1.49007	0.549752	0.363461	1.02819	0.268604
P01857	Immunoglobulins	11	4	Ig gamma-1 chain C region OS=Homo sapiens GN=IGHG1 PE=1 SV=1	11.0452	7.23923	12.9148	18.4463	1.50468	1.49166	2.39363	3.32517
P01859	Immunoglobulins	9	3	Ig gamma-2 chain C region OS=Homo sapiens GN=IGHG2 PE=1 SV=2	1.15924	0.578462	1.5037	3.01561	0.157922	0.119193	0.278697	0.5436
P01860	Immunoglobulins	11	2	Ig gamma-3 chain C region OS=Homo sapiens GN=IGHG3 PE=1 SV=2	0.539726	0.276763	1.27291	1.45395	0.0735261	0.0570276	0.235922	0.262093
P01861	Immunoglobulins	11	4	Ig gamma-4 chain C region OS=Homo sapiens GN=IGHG4 PE=1 SV=1	2.68611	1.91733	6.34621	14.8272	0.365926	0.39507	1.17621	2.67277
P01834	Immunoglobulins	6	5	Ig kappa chain C region OS=Homo sapiens GN=IGKC PE=1 SV=1	26.5709	10.1207	25.5591	43.232	3.61973	2.08539	4.73713	7.79309
P0CG05;A0M8Q6;B9A064;P0CF74;P0CG04;P0CG06	Immunoglobulins	6	5	Ig lambda-2 chain C regions OS=Homo sapiens GN=IGLC2 PE=1 SV=1	4.13493	2.49442	6.45837	7.97036	0.563296	0.513981	1.197	1.43676
P01871	Immunoglobulins	18	9	Ig mu chain C region OS=Homo sapiens GN=IGHM PE=1 SV=3	8.46595	4.35802	7.86535	4.55222	1.15331	0.897979	1.45777	0.820593
P04220	Immunoglobulins	11	1	Ig mu heavy chain disease protein OS=Homo sapiens PE=1 SV=1	2.6055	0.904633	1.80507	0.95544	0.354943	0.186402	0.334552	0.17223
P01762;A0A0B4J1V1;P01763;P01780	Immunoglobulins	3	3	Immunoglobulin heavy variable 3-11 OS=Homo sapiens GN=IGHV3-11 PE=1 SV=2	0.772159	0.378092	0.25385	0.898726	0.10519	0.0779066	0.0470487	0.162006
P01764;P01768	Immunoglobulins	3	1	Immunoglobulin heavy variable 3-23 OS=Homo sapiens GN=IGHV3-23 PE=1 SV=2	1.26957	0.827387	0.826526	1.061	0.172952	0.170485	0.153189	0.191257
P01825;A0A075B6R2;A0A0C4DH41;P01824;P06331	Immunoglobulins	2	1	Immunoglobulin heavy variable 4-59 OS=Homo sapiens GN=IGHV4-59 PE=1 SV=2	2.66031	2.15181	2.10007	2.6565	0.362411	0.443385	0.389228	0.478867
P01591	Immunoglobulins	4	3	Immunoglobulin J chain OS=Homo sapiens GN=JCHAIN PE=1 SV=4	0.728865	0.617775	0.478819	0.668411	0.0992923	0.127294	0.0887445	0.120489
A0A075B6S6;P06310	Immunoglobulins	2	2	Immunoglobulin kappa variable 2D-30 OS=Homo sapiens GN=IGKV2D-30 PE=3 SV=1	0.271377	0.372455	0.669988	0.948618	0.0369693	0.0767452	0.124176	0.171
P01624	Immunoglobulins	1	1	Immunoglobulin kappa variable 3-15 OS=Homo sapiens GN=IGKV3-15 PE=1 SV=2	1.44611	1.57483	2.39775	2.38294	0.197002	0.324497	0.4444	0.429554
Q92928;O95716;P20336;P20337;P51153;P59190;P61006;P62820;Q15286;Q92930;Q96DA2;Q96E17;Q9H0U4	Immunoglobulins	4	2	Putative Ras-related protein Rab-1C OS=Homo sapiens GN=RAB1C PE=5 SV=2	0.727978	1.40356	1.13517	0.883761	0.0991715	0.289207	0.210393	0.159309
P01137	Immunoglobulins	2	2	Transforming growth factor beta-1 OS=Homo sapiens GN=TGFB1 PE=1 SV=2	0.534667	0.503467	0.4523	0.930033	0.072837	0.103741	0.0838294	0.16765
P02647	Lipoproteins	22	20	Apolipoprotein A-I OS=Homo sapiens GN=APOA1 PE=1 SV=1	9.62434	9.07977	5.0229	5.10877	1.31111	1.87091	0.930946	0.920918
P06727	Lipoproteins	25	24	Apolipoprotein A-IV OS=Homo sapiens GN=APOA4 PE=1 SV=3	2.68298	3.30347	2.55135	2.81422	0.365498	0.680687	0.472868	0.507297
P04114	Lipoproteins	201	185	Apolipoprotein B-100 OS=Homo sapiens GN=APOB PE=1 SV=2	8.08072	5.56653	15.0138	5.40079	1.10083	1.14699	2.78266	0.973558
P05090	Lipoproteins	5	4	Apolipoprotein D OS=Homo sapiens GN=APOD PE=1 SV=1	1.12621	0.348596	0.690832	0.51803	0.153422	0.0718291	0.128039	0.0933812
P02649	Lipoproteins	28	24	Apolipoprotein E OS=Homo sapiens GN=APOE PE=1 SV=1	20.8314	8.95235	29.2168	12.5929	2.83784	1.84465	5.41504	2.27002
O14791	Lipoproteins	2	1	Apolipoprotein L1 OS=Homo sapiens GN=APOL1 PE=1 SV=5	0.674241	0.391491	0.216758	0.351108	0.0918509	0.0806675	0.040174	0.0632916
P08519	Lipoproteins	26	24	Apolipoprotein(a) OS=Homo sapiens GN=LPA PE=1 SV=1	2.21029	2.91121	5.0281	3.22302	0.301104	0.599861	0.93191	0.580989
P02749	Lipoproteins	11	9	Beta-2-glycoprotein 1 OS=Homo sapiens GN=APOH PE=1 SV=3	2.84251	0.962261	1.14218	0.845059	0.387231	0.198276	0.211692	0.152332
P10909	Lipoproteins	18	13	Clusterin OS=Homo sapiens GN=CLU PE=1 SV=1	9.44676	9.75703	12.368	10.3352	1.28692	2.01046	2.29229	1.86305
Q92963	Lipoproteins	3	3	GTP-binding protein Rit1 OS=Homo sapiens GN=RIT1 PE=1 SV=1	0.665946	0.466402	0.428813	0.473038	0.090721	0.0961031	0.0794763	0.0852708
P05546	Lipoproteins	4	4	Heparin cofactor 2 OS=Homo sapiens GN=SERPIND1 PE=1 SV=3	0.738997	0.948764	1.65785	1.05353	0.100673	0.195495	0.307266	0.189911
P0CG39	Lipoproteins	17	2	POTE ankyrin domain family member J OS=Homo sapiens GN=POTEJ PE=3 SV=1	0.179993	0.152828	0.218206	0.225352	0.0245203	0.0314906	0.0404424	0.0406224
P02743	Lipoproteins	9	9	Serum amyloid P-component OS=Homo sapiens GN=APCS PE=1 SV=2	0.40826	0.759231	0.435536	4.61122	0.0556167	0.156441	0.0807224	0.831228
P31946	Other Plasma components	7	4	14-3-3 protein beta/alpha OS=Homo sapiens GN=YWHAB PE=1 SV=3	0.272337	0.52509	0.173407	0.39233	0.0371001	0.108196	0.0321393	0.0707222
P62258	Other Plasma components	4	2	14-3-3 protein epsilon OS=Homo sapiens GN=YWHAE PE=1 SV=1	0.0560933	0.143472	0.0243512	0.0844361	0.00764152	0.0295627	0.00451327	0.0152206
Q04917	Other Plasma components	4	1	14-3-3 protein eta OS=Homo sapiens GN=YWHAH PE=1 SV=4	0.247614	0.269895	0.129224	0.164851	0.0337321	0.0556125	0.0239504	0.0297164
P61981	Other Plasma components	4	1	14-3-3 protein gamma OS=Homo sapiens GN=YWHAG PE=1 SV=2	0.101393	0.124955	0.0447762	0.102962	0.0138126	0.0257472	0.00829883	0.0185602
O43865	Other Plasma components	4	3	Adenosylhomocysteinase 2 OS=Homo sapiens GN=AHCYL1 PE=1 SV=2	0.770122	0.634595	0.550617	0.567889	0.104913	0.13076	0.102052	0.102369
Q01518	Other Plasma components	1	1	Adenylyl cyclase-associated protein 1 OS=Homo sapiens GN=CAP1 PE=1 SV=5	0.0116313	0.0625793	0.00745348	0.0971814	0.00158451	0.0128946	0.00138143	0.0175181
P84077;P18085;P61204;P84085	Other Plasma components	3	3	ADP-ribosylation factor 1 OS=Homo sapiens GN=ARF1 PE=1 SV=2	4.39394	1.53761	6.34974	1.06345	0.598581	0.316828	1.17686	0.191699
P01011	Other Plasma components	7	6	Alpha-1-antichymotrypsin OS=Homo sapiens GN=SERPINA3 PE=1 SV=2	1.00829	0.964863	1.09518	0.861928	0.137359	0.198812	0.202981	0.155373
P02765	Other Plasma components	3	3	Alpha-2-HS-glycoprotein OS=Homo sapiens GN=AHSG PE=1 SV=1	2.14533	0.902658	0.367618	0.433806	0.292256	0.185995	0.0681344	0.0781988
P12814	Other Plasma components	29	14	Alpha-actinin-1 OS=Homo sapiens GN=ACTN1 PE=1 SV=2	0.385183	0.808363	0.214473	0.5362	0.0524729	0.166565	0.0397506	0.0966566
P06733;P09104	Other Plasma components	3	1	Alpha-enolase OS=Homo sapiens GN=ENO1 PE=1 SV=2	0.213591	0.25205	0.287664	0.232852	0.0290973	0.0519355	0.0533158	0.0419745
P16157	Other Plasma components	17	16	Ankyrin-1 OS=Homo sapiens GN=ANK1 PE=1 SV=3	11.6037	9.09055	2.30145	2.35358	1.58075	1.87313	0.426552	0.424261
P13929	Other Plasma components	2	1	Beta-enolase OS=Homo sapiens GN=ENO3 PE=1 SV=5	0.0338868	0.0775518	0.0562452	0.0329024	0.00461635	0.0159797	0.0104245	0.00593106
P12830	Other Plasma components	9	9	Cadherin-1 OS=Homo sapiens GN=CDH1 PE=1 SV=3	1.33098	1.99207	1.25194	2.35612	0.181318	0.410471	0.232034	0.424719
P00915	Other Plasma components	3	2	Carbonic anhydrase 1 OS=Homo sapiens GN=CA1 PE=1 SV=2	0.0373103	0.563516	0.0178363	0.161717	0.00508273	0.116114	0.00330579	0.0291515
Q96IY4	Other Plasma components	11	11	Carboxypeptidase B2 OS=Homo sapiens GN=CPB2 PE=1 SV=2	0.741646	2.93514	0.832329	2.7081	0.101033	0.604791	0.154264	0.488169
P15169	Other Plasma components	3	3	Carboxypeptidase N catalytic chain OS=Homo sapiens GN=CPN1 PE=1 SV=1	0.556452	0.528695	0.52876	0.400467	0.0758047	0.108939	0.0980005	0.072189
Q96Q11	Other Plasma components	1	1	CCA tRNA nucleotidyltransferase 1, mitochondrial OS=Homo sapiens GN=TRNT1 PE=1 SV=2	1.6204	0.377969	0.643581	0.67269	0.220746	0.0778813	0.119281	0.121261
O43866	Other Plasma components	4	4	CD5 antigen-like OS=Homo sapiens GN=CD5L PE=1 SV=1	0.503697	0.591253	0.456629	0.531829	0.068618	0.121829	0.0846318	0.0958686
P21926	Other Plasma components	3	3	CD9 antigen OS=Homo sapiens GN=CD9 PE=1 SV=4	0.317379	1.0535	0.212386	0.565362	0.0432361	0.217076	0.0393637	0.101913
P39060	Other Plasma components	4	4	Collagen alpha-1(XVIII) chain OS=Homo sapiens GN=COL18A1 PE=1 SV=5	1.1954	0.084961	0.0385572	0.0963927	0.162848	0.0175064	0.0071462	0.017376
P02747	Other Plasma components	5	2	Complement C1q subcomponent subunit C OS=Homo sapiens GN=C1QC PE=1 SV=3	0.677344	0.611219	6.61176	0.839825	0.0922737	0.125943	1.22543	0.151389
P12724	Other Plasma components	2	2	Eosinophil cationic protein OS=Homo sapiens GN=RNASE3 PE=1 SV=2	0.240508	0.535522	0.0618528	0.506888	0.0327641	0.110345	0.0114638	0.0913728
P27105	Other Plasma components	12	11	Erythrocyte band 7 integral membrane protein OS=Homo sapiens GN=STOM PE=1 SV=3	0.856255	1.67132	1.95097	1.36131	0.116646	0.344378	0.361593	0.245393
P16452	Other Plasma components	2	2	Erythrocyte membrane protein band 4.2 OS=Homo sapiens GN=EPB42 PE=1 SV=3	0.5757	0.896486	2.57884	0.381833	0.0784268	0.184723	0.477963	0.0688301
P23142	Other Plasma components	13	13	Fibulin-1 OS=Homo sapiens GN=FBLN1 PE=1 SV=4	0.606271	0.403156	3.12805	1.28877	0.0825915	0.0830711	0.579754	0.232317
Q9H3K2	Other Plasma components	1	1	Growth hormone-inducible transmembrane protein OS=Homo sapiens GN=GHITM PE=1 SV=2	1.6048	1.6958	2.81787	2.82443	0.218619	0.349424	0.522265	0.509139
P04899	Other Plasma components	3	1	Guanine nucleotide-binding protein G(i) subunit alpha-2 OS=Homo sapiens GN=GNAI2 PE=1 SV=3	0.0871044	0.459113	0.20202	0.333125	0.0118661	0.0946012	0.0374425	0.0600499
P69905	Other Plasma components	3	3	Hemoglobin subunit alpha OS=Homo sapiens GN=HBA1 PE=1 SV=2	1.5376	5.01992	1.11613	3.02033	0.209465	1.03437	0.206864	0.544451
P68871;P02100;P69891;P69892	Other Plasma components	10	5	Hemoglobin subunit beta OS=Homo sapiens GN=HBB PE=1 SV=2	1.96759	10.8838	1.33552	6.78832	0.268042	2.24263	0.247526	1.22368
P02042	Other Plasma components	8	3	Hemoglobin subunit delta OS=Homo sapiens GN=HBD PE=1 SV=2	0.203547	0.530573	0.112045	0.348945	0.0277289	0.109326	0.0207665	0.0629017
P02790	Other Plasma components	10	7	Hemopexin OS=Homo sapiens GN=HPX PE=1 SV=2	1.80865	0.784521	1.52488	0.475526	0.24639	0.161652	0.282622	0.0857194
Q07000;P01893;P04439;P05534;P13746;P16188;P30443;P30447;P30455;P30501;P30508;Q29960;Q29963	Other Plasma components	1	1	HLA class I histocompatibility antigen, Cw-15 alpha chain OS=Homo sapiens GN=HLA-C PE=1 SV=1	0.0642189	0.20249	0.00319267	0.13054	0.00874846	0.0417236	0.000591731	0.0235315
P49639	Other Plasma components	1	1	Homeobox protein Hox-A1 OS=Homo sapiens GN=HOXA1 PE=1 SV=2	6.13211	1.95779	0.803025	3.88939	0.83537	0.403408	0.148833	0.70111
P35453	Other Plasma components	3	3	Homeobox protein Hox-D13 OS=Homo sapiens GN=HOXD13 PE=1 SV=3	0.274818	0.12029	0.14982	0.117893	0.037438	0.024786	0.0277676	0.0212516
P01619;A0A0C4DH25	Other Plasma components	5	4	Immunoglobulin kappa variable 3-20 OS=Homo sapiens GN=IGKV3-20 PE=1 SV=2	0.52663	1.12375	1.11941	1.54195	0.0717421	0.231551	0.207472	0.277955
P17936	Other Plasma components	1	1	Insulin-like growth factor-binding protein 3 OS=Homo sapiens GN=IGFBP3 PE=1 SV=2	0.154787	0.0085048	0.00701768	0.0252355	0.0210864	0.00175243	0.00130066	0.00454901
P24593	Other Plasma components	3	2	Insulin-like growth factor-binding protein 5 OS=Homo sapiens GN=IGFBP5 PE=1 SV=1	0.916277	0.740272	0.440978	0.460402	0.124823	0.152535	0.081731	0.0829931
P05556	Other Plasma components	5	5	Integrin beta-1 OS=Homo sapiens GN=ITGB1 PE=1 SV=2	1.61263	0.6244	0.585978	0.674186	0.219686	0.128659	0.108605	0.12153
Q14624	Other Plasma components	41	38	Inter-alpha-trypsin inhibitor heavy chain H4 OS=Homo sapiens GN=ITIH4 PE=1 SV=4	17.6127	13.4593	5.43493	3.04694	2.39936	2.77331	1.00731	0.549248
P13646	Other Plasma components	3	1	Keratin, type I cytoskeletal 13 OS=Homo sapiens GN=KRT13 PE=1 SV=4	0.0604047	0.0916755	0.169101	0.0883784	0.00822886	0.0188899	0.0313412	0.0159313
P48059	Other Plasma components	1	1	LIM and senescent cell antigen-like-containing domain protein 1 OS=Homo sapiens GN=LIMS1 PE=1 SV=4	0.301369	1.31239	0.247415	0.852274	0.0410551	0.270421	0.0458559	0.153633
P07195	Other Plasma components	6	5	L-lactate dehydrogenase B chain OS=Homo sapiens GN=LDHB PE=1 SV=2	0.250184	0.420175	0.32885	0.401962	0.0340822	0.0865781	0.0609492	0.0724585
P61626	Other Plasma components	8	8	Lysozyme C OS=Homo sapiens GN=LYZ PE=1 SV=1	9.85582	2.44389	7.73113	1.51493	1.34265	0.503569	1.43289	0.273085
P35625	Other Plasma components	5	5	Metalloproteinase inhibitor 3 OS=Homo sapiens GN=TIMP3 PE=1 SV=2	0.523735	1.20361	0.551465	0.938006	0.0713477	0.248008	0.102209	0.169087
Q9UPY8	Other Plasma components	2	2	Microtubule-associated protein RP/EB family member 3 OS=Homo sapiens GN=MAPRE3 PE=1 SV=1	0.310197	0.374504	0.26999	0.194486	0.0422577	0.0771675	0.05004	0.0350586
Q96T52	Other Plasma components	2	1	Mitochondrial inner membrane protease subunit 2 OS=Homo sapiens GN=IMMP2L PE=2 SV=1	1.41772	2.84478	3.16477	2.0177	0.193135	0.586172	0.58656	0.363715
Q99836	Other Plasma components	1	1	Myeloid differentiation primary response protein MyD88 OS=Homo sapiens GN=MYD88 PE=1 SV=1	7.94112	0.656708	1.37405	0.829436	1.08181	0.135316	0.254667	0.149516
Q7Z5D8	Other Plasma components	3	1	NANOG neighbor homeobox OS=Homo sapiens GN=NANOGNB PE=2 SV=1	6.18412	5.01759	3.32422	16.6128	0.842455	1.03389	0.616111	2.99467
P55209	Other Plasma components	2	1	Nucleosome assembly protein 1-like 1 OS=Homo sapiens GN=NAP1L1 PE=1 SV=1	0	0.0465194	0	0.00469289	0	0.00958543	0	0.000845952
Q9NQR4	Other Plasma components	3	3	Omega-amidase NIT2 OS=Homo sapiens GN=NIT2 PE=1 SV=1	0.139513	0.220329	0.374206	0.430971	0.0190057	0.0453993	0.0693555	0.0776877
P00747;Q02325	Other Plasma components	31	27	Plasminogen OS=Homo sapiens GN=PLG PE=1 SV=2	3.85463	3.74105	6.79284	2.81536	0.525112	0.770851	1.25899	0.507503
P13224	Other Plasma components	2	2	Platelet glycoprotein Ib beta chain OS=Homo sapiens GN=GP1BB PE=1 SV=1	1.01936	2.37741	0.339481	1.3788	0.138866	0.48987	0.0629196	0.248545
P14770	Other Plasma components	2	2	Platelet glycoprotein IX OS=Homo sapiens GN=GP9 PE=1 SV=3	0.159604	0.608964	0.332435	0.528931	0.0217426	0.125478	0.0616135	0.0953462
P08567	Other Plasma components	7	7	Pleckstrin OS=Homo sapiens GN=PLEK PE=1 SV=3	0.225473	0.56727	0.245425	0.598512	0.0307159	0.116887	0.0454871	0.107889
Q5T1J6	Other Plasma components	1	1	Protein FAM182A OS=Homo sapiens GN=FAM182A PE=2 SV=1	6.08445	1.08735	0.505449	0.35831	0.828877	0.224052	0.09368	0.0645897
Q9H8W3	Other Plasma components	2	2	Protein FAM204A OS=Homo sapiens GN=FAM204A PE=2 SV=1	0.0394625	0.367007	0.00604889	0.147454	0.00537593	0.0756226	0.0011211	0.0265804
Q9BXY0	Other Plasma components	1	1	Protein MAK16 homolog OS=Homo sapiens GN=MAK16 PE=1 SV=2	0.216137	0.481015	0.118593	1.11566	0.0294441	0.0991141	0.0219801	0.201112
Q5T8A7	Other Plasma components	5	4	Protein phosphatase 1 regulatory subunit 26 OS=Homo sapiens GN=PPP1R26 PE=1 SV=1	0.986906	1.2175	0.766766	1.43969	0.134445	0.250868	0.142113	0.259522
P61026	Other Plasma components	3	1	Ras-related protein Rab-10 OS=Homo sapiens GN=RAB10 PE=1 SV=1	0.0710854	0.0361521	0.00819646	0.0395592	0.00968386	0.00744922	0.00151913	0.00713102
P61106	Other Plasma components	2	1	Ras-related protein Rab-14 OS=Homo sapiens GN=RAB14 PE=1 SV=4	0.130163	0.113468	0.0334536	0.128372	0.0177319	0.0233804	0.0062003	0.0231406
Q13127	Other Plasma components	2	2	RE1-silencing transcription factor OS=Homo sapiens GN=REST PE=1 SV=3	0.544099	0.32791	0.341522	0.365404	0.0741219	0.0675665	0.0632978	0.0658685
Q99969	Other Plasma components	5	3	Retinoic acid receptor responder protein 2 OS=Homo sapiens GN=RARRES2 PE=1 SV=1	4.0025	0.273993	0.221953	0.155543	0.545255	0.0564568	0.0411369	0.0280385
P34096	Other Plasma components	5	2	Ribonuclease 4 OS=Homo sapiens GN=RNASE4 PE=1 SV=3	0.913973	0.455878	1.06534	0.924532	0.124509	0.0939346	0.197451	0.166658
Q5EBL4	Other Plasma components	1	1	RILP-like protein 1 OS=Homo sapiens GN=RILPL1 PE=1 SV=1	0.0680229	0.244143	0.0711984	0.326646	0.00926667	0.0503061	0.0131959	0.058882
Q96BU1	Other Plasma components	2	1	S100P-binding protein OS=Homo sapiens GN=S100PBP PE=1 SV=1	0.306976	0.153942	0.346265	0.241991	0.041819	0.03172	0.0641768	0.0436217
P49908	Other Plasma components	4	4	Selenoprotein P OS=Homo sapiens GN=SELENOP PE=1 SV=3	1.40017	0.739076	1.09156	0.902097	0.190744	0.152288	0.20231	0.162614
P20794	Other Plasma components	5	5	Serine/threonine-protein kinase MAK OS=Homo sapiens GN=MAK PE=1 SV=2	6.24287	3.46782	3.27924	1.10605	0.850457	0.714551	0.607776	0.19938
P02787	Other Plasma components	29	25	Serotransferrin OS=Homo sapiens GN=TF PE=1 SV=3	4.19161	5.3213	5.9989	3.61314	0.571017	1.09647	1.11184	0.651313
P02768	Other Plasma components	57	51	Serum albumin OS=Homo sapiens GN=ALB PE=1 SV=2	56.9682	44.8005	55.4776	34.2293	7.7607	9.23125	10.2822	6.17026
P11166	Other Plasma components	8	8	Solute carrier family 2, facilitated glucose transporter member 1 OS=Homo sapiens GN=SLC2A1 PE=1 SV=2	1.36113	0.95638	1.25962	0.901924	0.185425	0.197064	0.233458	0.162583
P11277	Other Plasma components	27	24	Spectrin beta chain, erythrocytic OS=Homo sapiens GN=SPTB PE=1 SV=5	1.3148	0.832637	0.461349	0.853002	0.179114	0.171567	0.0855066	0.153764
Q8NCR6	Other Plasma components	2	2	Spermatid-specific manchette-related protein 1 OS=Homo sapiens GN=SMRP1 PE=1 SV=2	0.0908741	0.183889	0.143572	0.0531059	0.0123797	0.0378907	0.0266096	0.00957299
Q9UJT2	Other Plasma components	2	1	Testis-specific serine kinase substrate OS=Homo sapiens GN=TSKS PE=1 SV=3	0.0116336	0.0136872	0.00239076	0.072446	0.00158483	0.00282028	0.000443104	0.0130593
Q15560	Other Plasma components	2	1	Transcription elongation factor A protein 2 OS=Homo sapiens GN=TCEA2 PE=1 SV=1	0.279249	1.42858	1.99651	1.6562	0.0380418	0.294362	0.370033	0.29855
P37802	Other Plasma components	2	2	Transgelin-2 OS=Homo sapiens GN=TAGLN2 PE=1 SV=3	0.796618	0.988681	0.593135	1.60789	0.108522	0.20372	0.109932	0.289842
P02766	Other Plasma components	3	3	Transthyretin OS=Homo sapiens GN=TTR PE=1 SV=1	0.992161	0.43239	0.342123	0.463844	0.135161	0.089095	0.0634091	0.0836135
Q7Z4G4	Other Plasma components	1	1	tRNA (guanine(10)-N2)-methyltransferase homolog OS=Homo sapiens GN=TRMT11 PE=1 SV=1	0.203106	0.28315	5.88094	0.0140974	0.0276688	0.0583437	1.08998	0.00254123
Q9BQE3;P68363;Q71U36	Other Plasma components	7	2	Tubulin alpha-1C chain OS=Homo sapiens GN=TUBA1C PE=1 SV=1	0.0901413	0.161245	0.058187	0.125568	0.0122798	0.0332248	0.0107844	0.0226352
P68366	Other Plasma components	4	1	Tubulin alpha-4A chain OS=Homo sapiens GN=TUBA4A PE=1 SV=1	0.124575	0.270019	0.0938507	0.200071	0.0169707	0.0556379	0.0173943	0.0360652
Q9NY65	Other Plasma components	5	2	Tubulin alpha-8 chain OS=Homo sapiens GN=TUBA8 PE=1 SV=1	0.0942155	0.33138	0.277037	0.325212	0.0128349	0.0682816	0.0513462	0.0586234
Q9H4B7;Q13509	Other Plasma components	12	11	Tubulin beta-1 chain OS=Homo sapiens GN=TUBB1 PE=1 SV=1	1.19994	2.05808	2.28112	1.49666	0.163466	0.424071	0.422784	0.269791
P04350;P07437;P68371;Q13885;Q9BVA1	Other Plasma components	2	1	Tubulin beta-4A chain OS=Homo sapiens GN=TUBB4A PE=1 SV=2	0.0988665	0.255057	0.154331	0.145009	0.0134685	0.0525551	0.0286037	0.0261396
P02774	Other Plasma components	10	8	Vitamin D-binding protein OS=Homo sapiens GN=GC PE=1 SV=1	0.707936	1.15731	0.376872	0.851162	0.0964412	0.238465	0.0698496	0.153432
P07225	Other Plasma components	1	1	Vitamin K-dependent protein S OS=Homo sapiens GN=PROS1 PE=1 SV=1	0.280521	0.324881	0.032258	0.716371	0.0382151	0.0669424	0.0059787	0.129135
O75083	Other Plasma components	9	8	WD repeat-containing protein 1 OS=Homo sapiens GN=WDR1 PE=1 SV=4	0.159246	0.568746	0.513348	0.268969	0.0216939	0.117191	0.0951442	0.0484849
Q96LD1	Other Plasma components	1	1	Zeta-sarcoglycan OS=Homo sapiens GN=SGCZ PE=2 SV=1	6.31651	2.45829	6.6738	5.49541	0.860489	0.506537	1.23692	0.990615
Q8NEK5	Other Plasma components	2	1	Zinc finger protein 548 OS=Homo sapiens GN=ZNF548 PE=2 SV=2	2.68147	1.59151	2.96006	2.17755	0.365293	0.327933	0.548619	0.392531
Q9UKT9	Other Plasma components	1	1	Zinc finger protein Aiolos OS=Homo sapiens GN=IKZF3 PE=1 SV=2	0.0582907	0.595405	0.0268549	0.389485	0.00794087	0.122684	0.00497729	0.0702095
P25311	Other Plasma components	2	2	Zinc-alpha-2-glycoprotein OS=Homo sapiens GN=AZGP1 PE=1 SV=2	0.530149	0.24443	0.162859	0.278889	0.0722215	0.0503653	0.0301842	0.0502731
P31947	Tissue Leakage	3	1	14-3-3 protein sigma OS=Homo sapiens GN=SFN PE=1 SV=1	0.378881	0.266252	0.149334	0.188588	0.0516144	0.0548619	0.0276776	0.0339954
P27348	Tissue Leakage	5	2	14-3-3 protein theta OS=Homo sapiens GN=YWHAQ PE=1 SV=1	0.31362	0.34478	0.268735	0.140166	0.042724	0.0710427	0.0498075	0.0252667
P63104	Tissue Leakage	8	5	14-3-3 protein zeta/delta OS=Homo sapiens GN=YWHAZ PE=1 SV=1	0.337874	1.62313	0.357439	0.902782	0.0460281	0.33445	0.0662479	0.162737
P62736;P63267;P68032;P68133	Tissue Leakage	23	4	Actin, aortic smooth muscle OS=Homo sapiens GN=ACTA2 PE=1 SV=1	0.358904	0.504228	0.335312	0.829	0.048893	0.103897	0.0621468	0.149437
P63261;P60709	Tissue Leakage	31	8	Actin, cytoplasmic 2 OS=Homo sapiens GN=ACTG1 PE=1 SV=1	6.49933	9.75057	3.75795	10.6424	0.885395	2.00913	0.6965	1.91841
P61158	Tissue Leakage	2	1	Actin-related protein 3 OS=Homo sapiens GN=ACTR3 PE=1 SV=3	0.00129436	0.10673	0	0.0636191	0.000176329	0.0219919	0	0.0114681
O43707	Tissue Leakage	16	4	Alpha-actinin-4 OS=Homo sapiens GN=ACTN4 PE=1 SV=2	0.455026	0.551622	0.502223	0.501366	0.0619876	0.113663	0.0930821	0.0903774
P03950	Tissue Leakage	7	7	Angiogenin OS=Homo sapiens GN=ANG PE=1 SV=1	5.70849	2.31424	2.73983	2.54227	0.77766	0.476854	0.5078	0.458276
P02652	Tissue Leakage	3	3	Apolipoprotein A-II OS=Homo sapiens GN=APOA2 PE=1 SV=1	0.410466	0.317679	0.110149	0.230107	0.0559173	0.0654584	0.0204151	0.0414796
P02656	Tissue Leakage	2	1	Apolipoprotein C-III OS=Homo sapiens GN=APOC3 PE=1 SV=1	0.19283	0.274556	0.0981203	0.112112	0.026269	0.0565729	0.0181856	0.0202096
P16152	Tissue Leakage	1	1	Carbonyl reductase [NADPH] 1 OS=Homo sapiens GN=CBR1 PE=1 SV=3	0.546496	0.816565	0.822577	1.28184	0.0744484	0.168255	0.152457	0.231068
P49913	Tissue Leakage	1	1	Cathelicidin antimicrobial peptide OS=Homo sapiens GN=CAMP PE=1 SV=1	0.202216	0.00852678	0.194255	0.0161775	0.0275476	0.00175696	0.0360033	0.00291619
P02746	Tissue Leakage	10	8	Complement C1q subcomponent subunit B OS=Homo sapiens GN=C1QB PE=1 SV=3	0.831539	0.651604	5.75493	1.06411	0.113279	0.134264	1.06662	0.19182
P07358	Tissue Leakage	16	15	Complement component C8 beta chain OS=Homo sapiens GN=C8B PE=1 SV=3	0.844153	2.40619	0.490057	1.82198	0.114998	0.495802	0.0908273	0.328435
Q6UXN8	Tissue Leakage	1	1	C-type lectin domain family 9 member A OS=Homo sapiens GN=CLEC9A PE=1 SV=1	0.0449162	0.33906	0.0429047	0.235359	0.00611887	0.0698641	0.00795198	0.0424264
Q92506	Tissue Leakage	2	2	Estradiol 17-beta-dehydrogenase 8 OS=Homo sapiens GN=HSD17B8 PE=1 SV=2	0.363719	0.0581788	0.477603	0.274611	0.049549	0.0119879	0.0885192	0.0495019
Q86UX7	Tissue Leakage	16	15	Fermitin family homolog 3 OS=Homo sapiens GN=FERMT3 PE=1 SV=1	0.889766	1.69825	0.600763	1.12521	0.121212	0.349928	0.111346	0.202833
P21333	Tissue Leakage	66	59	Filamin-A OS=Homo sapiens GN=FLNA PE=1 SV=4	2.22285	2.02089	2.09243	2.56104	0.302816	0.41641	0.387811	0.461658
P30043	Tissue Leakage	1	1	Flavin reductase (NADPH) OS=Homo sapiens GN=BLVRB PE=1 SV=3	0.0203687	0.000399003	0.00212098	0.00521452	0.00277481	8.22154e-05	0.000393102	0.00093998
P06396	Tissue Leakage	22	21	Gelsolin OS=Homo sapiens GN=GSN PE=1 SV=1	4.62922	3.60071	7.89471	3.74915	0.630633	0.741933	1.46321	0.675829
P04406	Tissue Leakage	12	11	Glyceraldehyde-3-phosphate dehydrogenase OS=Homo sapiens GN=GAPDH PE=1 SV=3	1.36983	1.50475	1.27461	1.84579	0.18661	0.310056	0.236236	0.332727
Q14344	Tissue Leakage	2	1	Guanine nucleotide-binding protein subunit alpha-13 OS=Homo sapiens GN=GNA13 PE=1 SV=2	0.631141	1.42941	1.77084	2.28966	0.0859794	0.294534	0.328209	0.412739
P11142;P0DMV8;P0DMV9;P17066;P34931;P48741;P54652	Tissue Leakage	8	7	Heat shock cognate 71 kDa protein OS=Homo sapiens GN=HSPA8 PE=1 SV=1	0.337123	0.392268	0.260453	0.399569	0.0459258	0.0808277	0.0482724	0.0720272
Q04756	Tissue Leakage	5	5	Hepatocyte growth factor activator OS=Homo sapiens GN=HGFAC PE=1 SV=1	1.29955	0.333787	0.245344	0.25365	0.177036	0.0687775	0.0454722	0.0457235
P01889;P03989;P10319;P18463;P18464;P18465;P30460;P30461;P30462;P30464;P30466;P30475;P30479;P30480;P30481;P30483;P30484;P30485;P30487;P30488;P30490;P30491;P30492;P30493;P30495;P30498;P30685;Q04826;Q29718;Q29836;Q29940;Q95365	Tissue Leakage	3	2	HLA class I histocompatibility antigen, B-7 alpha chain OS=Homo sapiens GN=HLA-B PE=1 SV=3	0.175499	0.265249	0.0376956	0.264309	0.023908	0.0546552	0.00698652	0.0476449
P05106	Tissue Leakage	16	14	Integrin beta-3 OS=Homo sapiens GN=ITGB3 PE=1 SV=2	0.95769	2.13146	2.13338	2.95866	0.130465	0.439192	0.395401	0.533335
Q14532	Tissue Leakage	2	1	Keratin, type I cuticular Ha2 OS=Homo sapiens GN=KRT32 PE=2 SV=3	0.417456	0.512094	0.113325	0.205575	0.0568695	0.105518	0.0210036	0.0370575
Q92764;Q15323	Tissue Leakage	5	4	Keratin, type I cuticular Ha5 OS=Homo sapiens GN=KRT35 PE=2 SV=5	8.30855	4.51387	2.72557	2.46133	1.13186	0.930092	0.505159	0.443685
P13645;O76013;O76014;O76015;Q14525	Tissue Leakage	26	21	Keratin, type I cytoskeletal 10 OS=Homo sapiens GN=KRT10 PE=1 SV=6	6.77024	2.44202	3.99324	4.82588	0.922301	0.503183	0.740109	0.869923
Q99456	Tissue Leakage	3	1	Keratin, type I cytoskeletal 12 OS=Homo sapiens GN=KRT12 PE=1 SV=1	0.387019	0.0725167	0.123282	0.130473	0.0527231	0.0149422	0.0228491	0.0235194
P02533	Tissue Leakage	21	7	Keratin, type I cytoskeletal 14 OS=Homo sapiens GN=KRT14 PE=1 SV=4	1.20598	1.05664	1.17223	1.16374	0.164289	0.217722	0.217262	0.209779
P19012	Tissue Leakage	11	4	Keratin, type I cytoskeletal 15 OS=Homo sapiens GN=KRT15 PE=1 SV=3	0.202718	0.308047	0.137475	0.282432	0.0276159	0.0634737	0.0254797	0.0509119
P08779	Tissue Leakage	21	9	Keratin, type I cytoskeletal 16 OS=Homo sapiens GN=KRT16 PE=1 SV=4	1.55313	0.761068	1.53157	0.685956	0.211581	0.15682	0.283862	0.123652
Q04695	Tissue Leakage	12	3	Keratin, type I cytoskeletal 17 OS=Homo sapiens GN=KRT17 PE=1 SV=2	6.06875	0.970131	3.18249	0.485436	0.826737	0.199898	0.589843	0.0875057
P05783	Tissue Leakage	6	5	Keratin, type I cytoskeletal 18 OS=Homo sapiens GN=KRT18 PE=1 SV=2	2.28722	1.66965	1.53234	2.99013	0.311585	0.344035	0.284004	0.539007
P08727	Tissue Leakage	8	1	Keratin, type I cytoskeletal 19 OS=Homo sapiens GN=KRT19 PE=1 SV=4	0.316329	0.140932	0.114093	0.172412	0.0430931	0.0290393	0.0211461	0.0310793
Q2M2I5	Tissue Leakage	3	1	Keratin, type I cytoskeletal 24 OS=Homo sapiens GN=KRT24 PE=1 SV=1	0.0198926	0.0148859	0.0119997	0.0843171	0.00270994	0.00306727	0.00222403	0.0151992
Q7Z3Z0	Tissue Leakage	5	1	Keratin, type I cytoskeletal 25 OS=Homo sapiens GN=KRT25 PE=1 SV=1	0.965719	1.27363	1.00614	1.32074	0.131559	0.262434	0.186478	0.23808
Q7Z3Y9	Tissue Leakage	3	2	Keratin, type I cytoskeletal 26 OS=Homo sapiens GN=KRT26 PE=1 SV=2	0.237923	0.404798	0.325798	0.342689	0.032412	0.0834096	0.0603835	0.0617738
Q7Z3Y8	Tissue Leakage	5	1	Keratin, type I cytoskeletal 27 OS=Homo sapiens GN=KRT27 PE=1 SV=2	2.06915	0.748714	1.5731	1.64338	0.281877	0.154274	0.291559	0.296239
Q7Z3Y7	Tissue Leakage	7	4	Keratin, type I cytoskeletal 28 OS=Homo sapiens GN=KRT28 PE=1 SV=2	0.645606	0.646085	1.10859	0.856159	0.0879501	0.133127	0.205466	0.154333
P35527	Tissue Leakage	28	24	Keratin, type I cytoskeletal 9 OS=Homo sapiens GN=KRT9 PE=1 SV=3	3.14542	1.21846	2.13713	3.55592	0.428496	0.251066	0.396096	0.640998
P04264	Tissue Leakage	30	26	Keratin, type II cytoskeletal 1 OS=Homo sapiens GN=KRT1 PE=1 SV=6	5.61176	2.89935	3.53139	6.60597	0.764483	0.597417	0.654509	1.19081
Q7Z794	Tissue Leakage	9	6	Keratin, type II cytoskeletal 1b OS=Homo sapiens GN=KRT77 PE=2 SV=3	1.3539	1.44843	1.49921	2.57527	0.18444	0.298452	0.277864	0.464224
P35908;P19013	Tissue Leakage	24	15	Keratin, type II cytoskeletal 2 epidermal OS=Homo sapiens GN=KRT2 PE=1 SV=2	2.95125	1.07395	1.62717	1.38365	0.402044	0.22129	0.301581	0.24942
Q01546	Tissue Leakage	9	5	Keratin, type II cytoskeletal 2 oral OS=Homo sapiens GN=KRT76 PE=1 SV=2	3.2284	2.85205	1.81042	2.33905	0.439801	0.587672	0.335543	0.421643
P13647	Tissue Leakage	17	7	Keratin, type II cytoskeletal 5 OS=Homo sapiens GN=KRT5 PE=1 SV=3	0.885612	0.596002	0.879099	0.982557	0.120646	0.122808	0.162932	0.177118
P02538;O95678;P48668	Tissue Leakage	23	4	Keratin, type II cytoskeletal 6A OS=Homo sapiens GN=KRT6A PE=1 SV=3	0.6594	0.296979	0.333017	0.36517	0.0898291	0.0611931	0.0617215	0.0658263
P04259	Tissue Leakage	18	1	Keratin, type II cytoskeletal 6B OS=Homo sapiens GN=KRT6B PE=1 SV=5	1.25492	0.828322	1.15316	0.58804	0.170956	0.170678	0.213727	0.106001
Q86Y46;Q14CN4;Q7RTS7	Tissue Leakage	6	4	Keratin, type II cytoskeletal 73 OS=Homo sapiens GN=KRT73 PE=1 SV=1	2.03833	0.418354	1.25985	0.879902	0.277679	0.0862027	0.2335	0.158613
Q14766	Tissue Leakage	13	10	Latent-transforming growth factor beta-binding protein 1 OS=Homo sapiens GN=LTBP1 PE=1 SV=4	0.111491	0.333991	0.162146	0.875297	0.0151883	0.0688196	0.0300523	0.157783
O14960	Tissue Leakage	2	2	Leukocyte cell-derived chemotaxin-2 OS=Homo sapiens GN=LECT2 PE=1 SV=2	2.23524	0.352476	0.759937	0.202605	0.304504	0.0726285	0.140847	0.0365221
P48740	Tissue Leakage	3	1	Mannan-binding lectin serine protease 1 OS=Homo sapiens GN=MASP1 PE=1 SV=3	0.23736	0.255329	0.110656	0.0584439	0.0323353	0.0526112	0.020509	0.0105352
P35579	Tissue Leakage	28	24	Myosin-9 OS=Homo sapiens GN=MYH9 PE=1 SV=4	2.2412	1.45605	1.7619	1.2989	0.305316	0.300023	0.326552	0.234142
P62937	Tissue Leakage	3	3	Peptidyl-prolyl cis-trans isomerase A OS=Homo sapiens GN=PPIA PE=1 SV=2	1.08087	2.05325	3.33323	1.44239	0.147245	0.423076	0.617781	0.260009
P16671	Tissue Leakage	5	5	Platelet glycoprotein 4 OS=Homo sapiens GN=CD36 PE=1 SV=2	0.437055	0.73749	0.404637	0.705852	0.0595394	0.151962	0.0749956	0.127238
Q9Y2S7	Tissue Leakage	1	1	Polymerase delta-interacting protein 2 OS=Homo sapiens GN=POLDIP2 PE=1 SV=1	5.62059	3.49394	8.31219	3.54179	0.765685	0.719934	1.54058	0.638451
Q15113	Tissue Leakage	8	7	Procollagen C-endopeptidase enhancer 1 OS=Homo sapiens GN=PCOLCE PE=1 SV=2	1.28824	0.143806	0.641701	0.17673	0.175495	0.0296316	0.118933	0.0318577
P07737	Tissue Leakage	7	6	Profilin-1 OS=Homo sapiens GN=PFN1 PE=1 SV=2	0.900507	1.69073	0.782354	1.49268	0.122675	0.348379	0.145002	0.269074
P55198	Tissue Leakage	2	2	Protein AF-17 OS=Homo sapiens GN=MLLT6 PE=1 SV=2	0.10896	0.307418	0.123947	0.222163	0.0148435	0.0633442	0.0229724	0.0400475
P02760	Tissue Leakage	3	3	Protein AMBP OS=Homo sapiens GN=AMBP PE=1 SV=1	0.872093	0.178124	0.0748998	0.106639	0.118804	0.0367028	0.013882	0.019223
Q92954	Tissue Leakage	16	15	Proteoglycan 4 OS=Homo sapiens GN=PRG4 PE=1 SV=2	4.44917	1.12968	2.02497	1.62167	0.606105	0.232773	0.375309	0.292325
P14618	Tissue Leakage	5	5	Pyruvate kinase PKM OS=Homo sapiens GN=PKM PE=1 SV=4	0.485278	0.558643	0.501448	0.564883	0.0661089	0.11511	0.0929385	0.101827
Q16623	Tissue Leakage	1	1	Syntaxin-1A OS=Homo sapiens GN=STX1A PE=1 SV=1	0.0176612	0.872796	0.00943131	0.625753	0.00240596	0.179842	0.001748	0.1128
Q9Y490	Tissue Leakage	70	61	Talin-1 OS=Homo sapiens GN=TLN1 PE=1 SV=3	1.06797	2.03807	3.69023	2.35282	0.145488	0.419949	0.683948	0.424124
Q9Y4G6	Tissue Leakage	8	4	Talin-2 OS=Homo sapiens GN=TLN2 PE=1 SV=4	1.52753	1.2962	2.02051	1.34378	0.208093	0.267084	0.374483	0.242233
Q96E29	Tissue Leakage	2	2	Transcription termination factor 3, mitochondrial OS=Homo sapiens GN=MTERF3 PE=1 SV=2	1.98251	0.6104	2.35193	0.379186	0.270075	0.125774	0.435908	0.068353
P67936	Tissue Leakage	6	4	Tropomyosin alpha-4 chain OS=Homo sapiens GN=TPM4 PE=1 SV=3	3.6064	1.93386	5.68532	1.63652	0.491295	0.398476	1.05372	0.295002
P18206	Tissue Leakage	25	23	Vinculin OS=Homo sapiens GN=VCL PE=1 SV=4	1.48972	3.12108	1.88926	4.12463	0.202943	0.643106	0.350155	0.743516
P04004	Tissue Leakage	17	17	Vitronectin OS=Homo sapiens GN=VTN PE=1 SV=1	28.1218	12.6117	8.20997	17.018	3.83099	2.59866	1.52164	3.06769
Q6ZN30	Tissue Leakage	3	2	Zinc finger protein basonuclin-2 OS=Homo sapiens GN=BNC2 PE=1 SV=1	0.178631	1.06773	0.726002	0.523494	0.0243347	0.220007	0.134557	0.0943661
